# Supplementary material for: Sex Differences in Symptom Presentation in Acute Coronary Syndromes: A Systematic Review and Meta‐analysis
Source: PubMed Central journal article supplement — J Am Heart Assoc. 2020 May 4;9(9):e014733. doi: 10.1161/JAHA.119.014733 (PMC7428564; doi:10.1161/jaha.119.014733), 2020-05-04
Supplement: JAH3-9-e014733-s001.pdf [file JAH3-9-e014733-s001.pdf]

# **SUPPLEMENTAL MATERIAL**

**Data S1. Search string ‘Sex Differences in Symptom Presentation in Acute Coronary Syndrome: A Systematic Review and Meta-Analysis’.**

| <b>Outcome</b>                            | <b>Determinant</b>                  | <b>Domain</b>                                                                                                                                                                                                                           |
|-------------------------------------------|-------------------------------------|-----------------------------------------------------------------------------------------------------------------------------------------------------------------------------------------------------------------------------------------|
| Symptom*<br>Presentation<br>Presentations | Sex<br>Sex factors (MeSH)<br>Gender | Acute coronary syndrome (MeSH)<br>Acute coronary syndrome*<br>ACS<br>Myocardial infarction (MeSH)<br>Myocardial infarct*<br>Heart attack<br>Heart infarct*<br>Cardiac infarct*<br>MI<br>Unstable angina (MeSH)<br>Unstable angina<br>UA |

**PubMed/MEDLINE:**

(((((symptom\*[Title/Abstract]) OR presentation[Title/Abstract]) OR presentations[Title/Abstract])) AND (((((((((((acute coronary syndrome[MeSH Terms]) OR acute coronary syndrome\*[Title/Abstract]) OR ACS[Title/Abstract]) OR myocardial infarction[MeSH Terms]) OR myocardial infarct\*[Title/Abstract]) OR heart attack[Title/Abstract]) OR heart infarct\*[Title/Abstract]) OR cardiac infarct\*[Title/Abstract]) OR MI[Title/Abstract]) OR unstable angina[MeSH Terms]) OR unstable angina[Title/Abstract]) OR UA[Title/Abstract])) AND (((sex[Title/Abstract]) OR sex factor[MeSH Terms]) OR gender[Title/Abstract])

## Embase:

| No. | Query                                                                                                                                                                                                                                                                                                                                                                                                                        | Results        |
|-----|------------------------------------------------------------------------------------------------------------------------------------------------------------------------------------------------------------------------------------------------------------------------------------------------------------------------------------------------------------------------------------------------------------------------------|----------------|
| #7  | #5 AND [embase]/lim AND ('article'/it OR 'article in press'/it OR 'review'/it)                                                                                                                                                                                                                                                                                                                                               | <b>2689</b>    |
| #5  | #1 AND #3 AND #4                                                                                                                                                                                                                                                                                                                                                                                                             | <b>5874</b>    |
| #4  | 'symptom'/exp OR 'symptom' OR 'symptom*':ti,ab,kw OR 'presentation':ti,ab,kw OR 'presentations':ti,ab,kw                                                                                                                                                                                                                                                                                                                     | <b>2102679</b> |
| #3  | 'sex':ti,ab,kw OR 'sex factor'/exp OR 'sex factor' OR 'gender':ti,ab,kw                                                                                                                                                                                                                                                                                                                                                      | <b>1093115</b> |
| #1  | 'acute coronary syndrome'/exp OR 'acute coronary syndrome' OR 'acute coronary syndrome*':ti,ab,kw OR 'acs':ti,ab,kw OR 'heart infarction'/exp OR 'heart infarction' OR 'myocardial infarct*':ti,ab,kw OR 'mi':ti,ab,kw OR 'heart attack':ti,ab,kw OR 'heart infarct*':ti,ab,kw OR 'cardiac infarct*':ti,ab,kw OR 'unstable angina pectoris'/exp OR 'unstable angina pectoris' OR 'unstable angina':ti,ab,kw OR 'ua':ti,ab,kw | <b>514604</b>  |

Filter: sources as embase or embase + medline, publication types as article, review or article in press

## Cochrane:

|   |   |     |                                                                                                                                        |        |               |
|---|---|-----|----------------------------------------------------------------------------------------------------------------------------------------|--------|---------------|
| - | + | #1  | MeSH descriptor: [Acute Coronary Syndrome] explode all trees                                                                           | MeSH   | 1629          |
| - | + | #2  | (acute coronary syndrome*);ti,ab,kw OR (ACS);ti,ab,kw                                                                                  | S      | Limits 7609   |
| - | + | #3  | MeSH descriptor: [Myocardial Infarction] explode all trees                                                                             | MeSH   | 10325         |
| - | + | #4  | (myocardial infarct*);ti,ab,kw OR (heart attack);ti,ab,kw OR (heart infarct*);ti,ab,kw OR (cardiac infarct*);ti,ab,kw OR (MI);ti,ab,kw | S      | Limits 38922  |
| - | + | #5  | MeSH descriptor: [Angina, Unstable] explode all trees                                                                                  | MeSH   | 1057          |
| - | + | #6  | (unstable angina);ti,ab,kw OR (UA);ti,ab,kw                                                                                            | S      | Limits 4810   |
| - | + | #7  | #1 OR #2 OR #3 OR #4 OR #5 OR #6                                                                                                       | Limits | 44482         |
| - | + | #8  | (symptom*);ti,ab,kw OR (presentation);ti,ab,kw OR (presentations);ti,ab,kw                                                             | S      | Limits 186850 |
| - | + | #9  | MeSH descriptor: [Sex] explode all trees                                                                                               | MeSH   | 35            |
| - | + | #10 | MeSH descriptor: [Sex Factors] explode all trees                                                                                       | MeSH   | 5719          |
| - | + | #11 | (gender);ti,ab,kw                                                                                                                      | S      | Limits 28284  |
| - | + | #12 | #9 OR #10 OR #11                                                                                                                       | Limits | 32440         |
| - | + | #13 | #8 AND #7 AND #12                                                                                                                      | Limits | 287           |
| - | + | #14 | Type a search term or use the S or MeSH buttons to compose                                                                             | S MeSH | Limits N/A    |

## **Data S2. Adapted Newcastle-Ottawa quality assessment scale(1) (maximum 7 stars).**

### **Selection**

1 star per numbered item (maximum 4 stars)

1. Representativeness of exposed\*cohort
  - a. Truly representative (star)
  - b. Somewhat representative (half star)
  - c. Selected group
  - d. No description
2. Selection of non-exposed cohort
  - a. Drawn from same community as exposed (star)
  - b. Drawn from different source
  - c. No description
3. Ascertainment of exposure
  - a. Medical record (star)
  - b. Interview (star)
  - c. Self-reported
  - d. No description
4. Demonstration that outcome of interest was not present at start of study
  - a. Yes (star)
  - b. No

### **Comparability**

Maximum of 2 stars

1. Comparability of cohorts of basis of design or analysis
  - a. Study controls for age (most important factor) (star)
  - b. Study controls for comorbidities (star)

### **Outcome**

1 star per numbered item (maximum 1 star)

1. Assessment of outcome
  - a. Independent blind assessment (star)
  - b. Medical record review (star)
  - c. Self-reported (questionnaire or interview)
  - d. Not described

\*For this review, exposure related to the sex of the patient. When assessing quality of the study using this Newcastle-Ottawa scale, women with ACS were seen as the exposed cohort, and men with ACS as the non-exposed cohort.

Study:

**Selection:**

1. Representativeness of exposed cohort
  - X star
2. Selection of non-exposed cohort
  - X star
3. Ascertainment of exposure
  - X star
4. Demonstration that outcome of interest was not present at start of study
  - X star

Total: /4

**Comparability:**

1. Study takes confounder age into account
  - X star
2. Study take confounder comorbidities into account
  - X star

Total: /2

**Outcome:**

1. Assessment of outcome
  - X star

Total: /1

Cumulative total: /7

**Table S1. Reported symptoms in each included study.**

| <b>Included study</b>               | <b>Symptoms reported by study</b>                                                                                                                                                                                                      |
|-------------------------------------|----------------------------------------------------------------------------------------------------------------------------------------------------------------------------------------------------------------------------------------|
| Tunstall-Pedoe et al., 1996 (2)     | Chest pain, syncope                                                                                                                                                                                                                    |
| Meischke et al., 1998(3)            | Chest pain, diaphoresis, shortness of breath, stomach or epigastric pain, nausea or vomiting, syncope                                                                                                                                  |
| Goldberg et al., 1998(4)            | Pain between shoulder blades, chest pain, diaphoresis, stomach or epigastric pain, jaw pain, left arm pain, nausea, neck pain, right arm pain, shortness of breath, syncope                                                            |
| Milner et al., 1999(5)              | Chest pain, pain between shoulder blades, nausea or vomiting, shortness of breath, palpitations, indigestion, fatigue, arm pain, diaphoresis, jaw pain, dizziness, neck pain                                                           |
| Culic et al., 2002(6)               | Chest pain, left arm pain, right arm pain, stomach or epigastric pain, neck pain, pain between shoulder blades, jaw pain, headache, diaphoresis, nausea, shortness of breath, belching, cough, dizziness, hiccups, tinnitus            |
| Grace et al., 2003(7)               | Chest pain, diaphoresis, shortness of breath, left arm pain, nausea, neck pain, fatigue, dizziness, indigestion, stomach or epigastric pain, syncope                                                                                   |
| Løvlien, Schei & Gjendal, 2006(8)   | Chest pain, left arm pain, jaw pain, pain between shoulder blades, nausea, shortness of breath                                                                                                                                         |
| Hirakawa et al., 2006(9)            | Chest pain                                                                                                                                                                                                                             |
| Arslanian-Engoren et al., 2006(10)  | Chest pain, shortness of breath, diaphoresis, left arm pain, nausea, right arm pain                                                                                                                                                    |
| Løvlien, Schei & Hole, 2006(11)     | Chest pain, diaphoresis, left arm pain, shortness of breath, nausea or vomiting, fatigue, dizziness, palpitations, right arm pain, jaw pain, hot flushes, pain between shoulder blades, stomach or epigastric pain, headache, syncope, |
| Dey et al., 2008(12)                | Chest pain, syncope, shortness of breath, palpitations, jaw pain, nausea or vomiting, diaphoresis                                                                                                                                      |
| Kirchberger et al., 2011(13)        | Chest pain, left arm or shoulder pain, right arm or shoulder pain, jaw pain, stomach or epigastric pain, pain between shoulder blades, nausea, shortness of breath, diaphoresis, fear, dizziness, syncope                              |
| Angerud et al., 2011(14)            | Chest pain                                                                                                                                                                                                                             |
| Canto et al., 2012(15)              | Chest pain                                                                                                                                                                                                                             |
| Pelter et al., 2012(16)             | Chest pain, shortness of breath, arm pain, diaphoresis, stomach or epigastric pain, jaw pain                                                                                                                                           |
| O'Donnell et al., 2012(17)          | Chest pain, shortness of breath, diaphoresis, left arm pain, nausea, fatigue, pain between shoulder blades, palpitations, indigestion, fear                                                                                            |
| Zevallos et al., 2012(18)           | Chest pain, left arm pain, pain between shoulder blades, stomach or epigastric pain                                                                                                                                                    |
| Coventry et al., 2013(19)           | Chest pain, left arm pain, right arm pain, diaphoresis, shortness of breath, abdominal or epigastric pain, nausea or vomiting, syncope, fatigue, pain between shoulder blades                                                          |
| Melberg et al., 2013(20)            | Chest pain, shortness of breath, syncope, nausea or vomiting, diaphoresis                                                                                                                                                              |
| Khan et al., 2013(21)               | Chest pain, fatigue, hot flushes, shortness of breath, diaphoresis, left arm or shoulder pain, pain between shoulder blades, nausea, dizziness, right arm or shoulder pain, neck pain, headache, dizziness, headache, jaw pain,        |
| Asgar Pour et al., 2015(22)         | Chest pain, arm pain, diaphoresis, shortness of breath, nausea or vomiting, palpitations, fatigue, indigestion, pain between shoulder blades,                                                                                          |
| DeVon et al., 2017(23)              | Chest pain, shortness of breath, fatigue, dizziness or lightheadedness, nausea, arm pain, sweating, pain between shoulder blades, palpitations, indigestion,                                                                           |
| Lichtman et al., 2018(24)           | Chest pain, dizziness, palpitations, shortness of breath, sweating, fatigue                                                                                                                                                            |
| Sederholm Lawesson et al., 2018(25) | No chest pain, neck pain, pain between shoulder blades, stomach pain, arm/hands pain, tiredness/fatigue, shortness of breath, syncope, nausea or vomiting, diaphoresis, fear                                                           |
| Allana et al., 2018(26)             | Chest pain, shortness of breath, diaphoresis, pain between shoulder blades, nausea or vomiting, stomach or epigastric pain, jaw pain, syncope, palpitations                                                                            |
| An et al., 2018(27)                 | Pain centrally in chest, pain between shoulder blades, left arm or shoulder pain, neck pain, jaw pain, right arm or shoulder pain, diaphoresis, hot flushes,                                                                           |



|                               |                                                                                                         |
|-------------------------------|---------------------------------------------------------------------------------------------------------|
|                               | fatigue, cough, palpitations, shortness of breath, indigestion, nausea or vomiting, dizziness, headache |
| Plaza-Martin et al., 2019(28) | Chest pain, shortness of breath, palpitations                                                           |

**Table S2. Subgroups for meta-regression.**

| <b>Included study</b>               | <b>Age: ≤ 65 years or &gt;65 years</b> |
|-------------------------------------|----------------------------------------|
| Tunstall-Pedoe et al., 1996(2)      | ≤ 65 years                             |
| Meischke et al., 1998(3)            | > 65 years                             |
| Goldberg et al., 1998(4)            | > 65 years                             |
| Milner et al., 1999(5)              | > 65 years                             |
| Culic et al., 2002(6)               | ≤ 65 years                             |
| Grace et al., 2003(7)               | ≤ 65 years                             |
| Løvlien, Schei & Gjendal, 2006(8)   | ≤ 65 years                             |
| Hirakawa et al., 2006(9)            | > 65 years                             |
| Arslanian-Engoren et al., 2006(10)  | > 65 years                             |
| Løvlien, Schei & Hole, 2006(11)     | ≤ 65 years                             |
| Dey et al., 2008(12)                | > 65 years                             |
| Kirchberger et al., 2011(13)        | ≤ 65 years                             |
| Angerud et al., 2011(14)            | ≤ 65 years                             |
| Canto et al., 2012(15)              | > 65 years                             |
| Pelter et al., 2012(16)             | > 65 years                             |
| O'Donnell et al., 2012(17)          | ≤ 65 years                             |
| Zevallos et al., 2012(18)           | > 65 years                             |
| Coventry et al., 2013(19)           | > 65 years                             |
| Melberg et al., 2013(20)            | ≤ 65 years                             |
| Khan et al., 2013(21)               | ≤ 65 years                             |
| Asgar Pour et al., 2015(22)         | ≤ 65 years                             |
| DeVon et al., 2017(23)              | ≤ 65 years                             |
| Lichtman et al., 2018(24)           | ≤ 65 years                             |
| Sederholm Lawesson et al., 2018(25) | > 65 years                             |
| Allana et al., 2018(26)             | ≤ 65 years                             |
| An et al., 2018(27)                 | ≤ 65 years                             |
| Plaza-Martin et al., 2019(28)       | > 65 years                             |

**Table S3. Results of the quality assessment using the Newcastle-Ottawa Scale.**

| Study                             | Selection<br>(maximum 4) | Comparability<br>(maximum 2) | Outcome<br>(maximum 1) | Total score<br>(maximum 7) |
|-----------------------------------|--------------------------|------------------------------|------------------------|----------------------------|
| Plaza-Martin 2019(28)             | ****                     |                              | *                      | 5                          |
| An 2018 (27)                      | ****                     | **                           |                        | 6                          |
| Allana 2018(26)                   | ****                     |                              |                        | 4                          |
| Sederholm Lawesson 2018 (25)      | ****                     | **                           |                        | 6                          |
| Lichtman 2018(24)                 | *** and half             |                              |                        | 3.5                        |
| DeVon 2017(23)                    | ****                     | *                            | *                      | 6                          |
| Asgar Pour 2015(22)               | *** and half             |                              | *                      | 4.5                        |
| Khan 2013 (21)                    | *** and half             |                              |                        | 3.5                        |
| Melberg 2013 (20)                 | *** and half             |                              | *                      | 4.5                        |
| Coventry 2013(19)                 | *** and half             | *                            | *                      | 5.5                        |
| Zevallos 2013 (18)                | *** and half             |                              | *                      | 4.5                        |
| O'Donnell 2012 (17)               | ****                     | **                           |                        | 6                          |
| Pelter 2012 (16)                  | *** and half             |                              |                        | 3.5                        |
| Canto 2012 (15)                   | ****                     | *                            | *                      | 6                          |
| Angerud 2011(14)                  | ** and half              |                              | *                      | 3.5                        |
| Kirchberger 2011(13)              | *** and half             | **                           |                        | 5.5                        |
| Dey 2008(12)                      | ****                     |                              | *                      | 5                          |
| DeVon 2008(29)                    | **                       |                              |                        | 2                          |
| Løvlien, Schei & Hole, 2006(11)   | *** and half             | *                            |                        | 4.5                        |
| Arslanian-Engoren 2006(10)        | ****                     | *                            | *                      | 6                          |
| Hirakawa 2006(9)                  | ****                     |                              | *                      | 5                          |
| Omran 2006(30)                    | **                       |                              |                        | 2                          |
| Løvlien, Schei & Gjendal, 2006(8) | *** and half             |                              |                        | 3.5                        |
| Chen 2005(31)                     | **                       | **                           |                        | 4                          |
| Grace 2003(7)                     | ****                     |                              |                        | 4                          |
| DeVon & Zerwic 2003(32)           | **                       |                              |                        | 2                          |
| Culic 2002(6)                     | ****                     | **                           |                        | 6                          |
| Milner 1999(5)                    | *** and half             | **                           |                        | 5.5                        |
| Goldberg 1998(4)                  | ***                      | **                           | *                      | 6                          |
| Meischke 1998(3)                  | ****                     |                              | *                      | 5                          |
| Tunstall-Pedoe 1996(2)            | *** and half             |                              | *                      | 4.5                        |

**Table S4. Odds ratios of symptoms experienced when presenting with ACS in women relative to men.**

| Symptom                      | Study                         | Sample size          | Crude OR (95% CI)   | Adjusted OR (95% CI) |
|------------------------------|-------------------------------|----------------------|---------------------|----------------------|
| Chest pain                   | Allana et al (26)             | M= 133, F= 116       | 1.23 (0.67-2.26)    |                      |
|                              | An et al(27)                  | M= 323, F= 483       | 0.64 (0.47-0.89)    | 0.63 (0.44-0.91)     |
|                              | Angerud et al(14)             | M=2805, F=1223       | 0.74 (0.59-0.93)    |                      |
|                              | Arslanian-Engoren et al(10)   | M= 1258, F=536       | 0.56 (0.43-0.73)    | 0.86 (0.63-1.17)     |
|                              | Asgar Pour et al (22)         | M=183, F=137         | 0.79 (0.36-1.74)    |                      |
|                              | Canto et al(15)               | M=661,932, F=481,581 | 0.61 (0.61-0.62)    |                      |
|                              | Coventry et al(19)            | M= 1060, F=621       | 0.54 (0.44-0.67)    | 0.70 (0.57-0.88)     |
|                              | Culic et al(6)                | M=1395, F=601        | 0.56 (0.43- 0.72)   | 0.62 (0.48-0.80)     |
|                              | DeVon et al (23)              | M=343, F=131         | 0.72 (0.46-1.11)    | 0.70 (0.44-1.12)     |
|                              | Dey et al (12)                | M=29213 F=14180      | 0.73 (0.68-0.79)    |                      |
|                              | Goldberg et al(4)             | M=810, F=550         | 0.84 (0.64-1.11)    | 0.80 (0.59-1.09)     |
|                              | Grace et al(7)                | M=347, F=135         | 0.83 (0.55-1.26)    |                      |
|                              | Hirakawa et al (9)            | M=1712, F=509        | 0.71 (0.57-0.90)    |                      |
|                              | Khan et al(21)                | M=710, F=305         | 0.67 (0.47-0.96)    |                      |
|                              | Kirchberger et al(13)         | M= 1710, F=568       | 0.90 (0.61-1.33)    | 0.83 (0.54-1.28)     |
|                              | Lichtman et al(24)            | M=976, F=2009        | 0.78 (0.61-1.00)    |                      |
|                              | Lovlien, Schei & Hole(11)     | M=384, F=149         | 0.52 (0.29-0.94)    | 0.53 (0.29-0.97)     |
|                              | Lovlien, Schei & Gjengedal(8) | M=44, F=38           | 0.62 (0.13-2.97)    |                      |
|                              | Milner et al (5)              | M=127, F=90          | 0.68 (0.39-1.17)    |                      |
|                              | Meischke et al (3)            | M=2970, F=1527       | 0.66 (0.54-0.82)    |                      |
|                              | Melberg et al (20)            | M=179, F=65          | 1.74 (0.98-3.09)    |                      |
|                              | O'Donnell et al (17)          | M=1402, F=545        | NS: OR not provided | NS: OR not provided  |
|                              | Pelter et al(16)              | M=221, F=110         | 0.88 (0.51-1.50)    |                      |
|                              | Plaza-Martin et al (28)       | M=749, F=307         | 0.76 (0.56-1.04)    |                      |
|                              | Sederholm Lawesson et al(25)  | M=406, F=126         | 0.20 (0.12-0.35)    |                      |
|                              | Tunstall-Pedoe et al(2)       | M=3991, F=1551       | 0.98 (0.86-1.11)    |                      |
|                              | Zevallos et al (18)           | M=778, F=637         | 0.61 (0.46-0.79)    |                      |
| Left arm or shoulder pain    | An et al(27)                  | M= 323, F= 483       | 0.94 (0.67-1.33)    | 2.16 (1.21-3.86)     |
|                              | Arslanian-Engoren et al(10)   | M= 1258, F=536       | 0.80 (0.64-0.98)    | 0.93 (0.74-1.16)     |
|                              | Coventry et al (19)           | M=1060, F=621        | 1.54 (1.14-2.08)    | 1.26 (0.89-1.80)     |
|                              | Culic et al(6)                | M=1395, F=601        | 1.28 (1.04-1.57)    | 1.32 (1.06-1.61)     |
|                              | Goldberg et al(4)             | M=810, F=550         | 1.00 (0.79-1.27)    | 1.20 (0.93-1.56)     |
|                              | Grace et al(7)                | M=347, F=135         | 1.29 (0.87-1.93)    |                      |
|                              | Khan et al(21)                | M=710, F=305         | 1.38 (1.05-1.80)    |                      |
|                              | Kirchberger et al(13)         | M= 1710, F=568       | 1.26 (1.03-1.52)    | 1.36 (1.10-1.69)     |
|                              | Lovlien, Schei & Hole(11)     | M=384, F=149         | 1.16 (0.80-1.70)    | 1.34 (0.90-1.98)     |
|                              | Lovlien, Schei & Gjengedal(8) | M=44, F=38           | 0.57 (0.22-1.46)    |                      |
|                              | O'Donnell et al(17)           | M=1402, F=545        | 1.17 (0.95-1.44)    | 1.27 (1.02-1.58)     |
|                              | Zevallos et al (18)           | M=778, F=637         | 0.53 (0.41-0.69)    |                      |
|                              | Right arm or shoulder pain    | An et al (27)        | M= 323, F= 483      | 0.66 (0.23-1.91)     |
| Arslanian-Engoren et al(10)  |                               | M= 1258, F=536       | 0.90 (0.65-1.26)    | 1.04 (0.74-1.48)     |
| Coventry et al(19)           |                               | M= 1060, F=621       | 0.57 (0.39-0.83)    | 0.70 (0.48-1.04)     |
| Culic et al (6)              |                               | M=1395, F=601        | 1.35 (1.11-1.64)    | 1.33 (1.09-1.61)     |
| Goldberg et al(4)            |                               | M=810, F=550         | 1.15 (0.86-1.53)    | 1.28 (0.93-1.79)     |
| Khan et al (21)              |                               | M=710, F=305         | 1.45 (1.06-1.99)    |                      |
| Kirchberger et al(13)        |                               | M= 1710, F=568       | 1.14 (0.93-1.40)    | 1.19 (0.95-1.48)     |
| Lovlien, Schei & Hole(11)    |                               | M=384, F=149         | 1.41 (0.94-2.13)    | 1.52 (1.00-2.32)     |
| Arm pain                     | Asgar Pour et al (22)         | M=183, F=137         | 0.84 (0.54-1.31)    |                      |
|                              | DeVon et al (23)              | M=343, F=131         | 1.30 (0.87-1.96)    | 1.28 (0.83-1.98)     |
|                              | Milner et al (5)              | M=127, F=90          | 1.66 (0.93-2.96)    |                      |
|                              | Pelter et al(16)              | M=221, F=110         | 1.50 (0.87-2.59)    |                      |
|                              | Sederholm Lawesson et al(25)  | M=406, F=126         | 2.73 (1.72-4.32)    | 2.55 (1.53-4.25)     |
| Pain between shoulder blades | Allana et al (26)             | M= 133, F= 116       | 3.06 (1.81-5.15)    |                      |
|                              | An et al(27)                  | M= 323, F= 483       | 1.99 (1.48-2.67)    | 2.13 (1.53-2.97)     |
|                              | Asgar Pour et al(22)          | M=183, F=137         | 1.29 (0.81-2.04)    |                      |
|                              | Coventry et al(19)            | M= 1060, F=621       | 1.62 (0.96-2.74)    | 1.62 (0.93-2.81)     |
|                              | Culic et al (6)               | M=1395, F=601        | 2.16 (1.52-3.06)    | 1.64 (1.16-2.27)     |
|                              | DeVon et al(23)               | M=343, F=131         | 2.98 (1.91-4.66)    | 1.75 (1.21-2.53)     |
|                              | Goldberg et al (4)            | M=810, F=550         | 2.43 (1.70-3.47)    | 2.63 (1.79-3.85)     |
|                              | Khan et al (21)               | M=710, F=305         | 2.03 (1.53-2.69)    |                      |
| Kirchberger et al (13)       | M= 1710, F=568                | 2.31 (1.88-2.82)     | 2.22 (1.78-2.77)    |                      |

|                            |                               |                             |                   |                     |                  |
|----------------------------|-------------------------------|-----------------------------|-------------------|---------------------|------------------|
|                            | Lovlien, Schei & Hole (11)    | M=384, F=149                | 1.91 (1.21-3.02)  | 1.80 (1.12-2.89)    |                  |
|                            | Lovlien, Schei & Gjengedal(8) | M=44, F=38                  | 3.45 (1.22-9.73)  |                     |                  |
|                            | Milner et al(5)               | M=127, F=90                 | 9.62 (2.10-44.11) |                     |                  |
|                            | O'Donnell et al(17)           | M=1402, F=545               | 1.62 (1.08-2.42)  | 1.57 (1.04-2.37)    |                  |
|                            | Sederholm Lawesson et al(25)  | M=406, F=126                | 3.10 (1.90-5.05)  | 3.59 (2.09-6.15)    |                  |
|                            | Zevallos et al (18)           | M=778, F=637                | 1.90 (1.34-2.70)  |                     |                  |
| Neck pain                  | An et al(27)                  | M= 323, F= 483              | 1.43 (1.01-2.03)  | 1.54 (1.04-2.27)    |                  |
|                            | Culic et al(6)                | M= 1395, F=601              | 1.75 (1.33-2.29)  | 1.56 (1.19-2.04)    |                  |
|                            | Goldberg et al(4)             | M=810, F=550                | 1.74 (1.26-2.39)  | 1.92 (1.28-2.86)    |                  |
|                            | Grace et al(7)                | M=347, F=135                | 2.08 (1.34-3.22)  |                     |                  |
|                            | Khan et al(21)                | M=710, F=305                | 2.13 (1.57-2.88)  |                     |                  |
|                            | Milner et al (5)              | M=127, F=90                 | 1.17 (0.46-2.96)  |                     |                  |
|                            | O'Donnell et al(17)           | M=1402, F=545               | 1.71 (1.32-2.21)  | 1.85 (1.42-2.40)    |                  |
|                            | Sederholm Lawesson et al(25)  | M=406, F= 126               | 2.40 (1.54-3.76)  | 2.97 (1.79-4.93)    |                  |
|                            | Allana et al (26)             | M= 133, F= 116              | 2.33 (1.29-4.22)  |                     |                  |
|                            | An et al (27)                 | M= 323, F= 483              | 0.70 (0.41-1.21)  | NS: OR not provided |                  |
| Jaw pain                   | Culic et al (6)               | M=1395, F=601               | 1.72 (1.20-2.47)  | 1.47 (1.04-2.08)    |                  |
|                            | Dey et al(12)                 | M=682, F=344                | 2.84 (1.69-4.76)  |                     |                  |
|                            | Goldberg et al (4)            | M=810, F=550                | 1.90 (1.28-2.82)  | 2.00 (1.23-3.22)    |                  |
|                            | Khan et al(21)                | M=710, F=305                | 2.11 (1.50-2.98)  |                     |                  |
|                            | Kirchberger et al(13)         | M= 1710, F=568              | 1.73 (1.42- 2.11) | 1.78 (1.43-2.21)    |                  |
|                            | Lovlien, Schei & Hole(11)     | M=384, F=149                | 1.53 (1.01-2.31)  | 1.66 (1.08-2.55)    |                  |
|                            | Lovlien, Schei & Gjengedal(8) | M=44, F=38                  | 3.00 (1.18-7.62)  |                     |                  |
|                            | Milner et al(5)               | M=127, F=90                 | 0.61 (0.18-2.05)  |                     |                  |
|                            | Pelter et al(16)              | M=221, F=110                | 1.94 (0.83-4.54)  |                     |                  |
|                            | Allana et al (26)             | M= 133, F=116               | 2.11 (1.24-3.59)  |                     |                  |
|                            | Coventry et al (19)           | M=1060, F=621               | 1.36 (0.74-2.51)  | 1.02 (0.55-1.91)    |                  |
|                            | Culic et al (6)               | M=1395, F=601               | 0.80 (0.61-1.05)  | 0.95 (0.73-1.23)    |                  |
|                            | Goldberg et al (4)            | M=810, F=550                | 0.73 (0.43-1.22)  | 0.90 (0.53-1.54)    |                  |
|                            | Grace et al(7)                | M=347, F=135                | 1.95 (0.93-4.09)  |                     |                  |
| Stomach or epigastric pain | Kirchberger et al(13)         | M= 1710, F=568              | 1.37 (1.03-1.83)  | 1.39 (1.02-1.91)    |                  |
|                            | Lovlien, Schei & Hole(11)     | M=384, F=149                | 1.29 (0.78-2.14)  | 1.38 (0.82-2.30)    |                  |
|                            | Meischke et al (3)            | M=2970, F=1527              | 0.98 (0.80-1.20)  |                     |                  |
|                            | Pelter et al(16)              | M=221, F=110                | 1.71 (0.51-5.72)  |                     |                  |
|                            | Sederholm Lawesson et al(25)  | M=406, F= 126               | 0.50 (0.21-1.21)  | 0.55 (0.21-1.42)    |                  |
|                            | Zevallos et al (18)           | M=778, F=637                | 1.80 (1.20-2.69)  |                     |                  |
|                            | Allana et al (26)             | M= 133, F=116               | 1.74 (1.00-3.05)  |                     |                  |
|                            | An et al(27)                  | M= 323, F= 483              | 1.88 (1.41-2.51)  | 2.13 (1.57-2.95)    |                  |
|                            | Arslanian-Engoren et al(10)   | M= 1258, F=536              | 1.13 (0.94-1.36)  | 1.10 (0.90-1.34)    |                  |
|                            | Asgar Pour et al (22)         | M=183, F=137                | 0.81 (0.48-1.34)  |                     |                  |
| Shortness of breath        | Coventry et al(19)            | M= 1060, F=621              | 1.14 (0.91-1.42)  | 1.05 (0.84-1.33)    |                  |
|                            | Culic et al(6)                | M=1395, F=601               | 1.80 (1.48-2.19)  | 1.51 (1.23-1.82)    |                  |
|                            | DeVon et al(23)               | M=343, F=131                | 1.32 (0.88-1.97)  | 1.45 (0.93-2.26)    |                  |
|                            | Dey et al (12)                | M=682, F=344                | 1.02 (0.79-1.33)  |                     |                  |
|                            | Goldberg et al(4)             | M=810, F=550                | 1.25 (1.00-1.56)  | 1.16 (0.92-1.49)    |                  |
|                            | Grace et al(7)                | M=347, F=135                | 1.47 (0.99-2.20)  |                     |                  |
|                            | Khan et al(21)                | M=710, F=305                | 0.99 (0.75-1.29)  |                     |                  |
|                            | Kirchberger et al(13)         | M= 1710, F=568              | 1.51 (1.25-1.83)  | 1.45 (1.17-1.78)    |                  |
|                            | Lichtman et al(24)            | M=976, F=2009               | 1.23 (1.06-1.43)  |                     |                  |
|                            | Lovlien, Schei & Hole(11)     | M=384, F=149                | 1.47 (1.00-2.16)  | 1.63 (1.10-2.42)    |                  |
|                            | Lovlien, Schei & Gjengedal(8) | M=44, F=38                  | 2.15 (0.88-5.24)  |                     |                  |
|                            | Milner et al(5)               | M=127, F=90                 | 1.82 (1.05-3.16)  | 1.68 (0.95-2.96)    |                  |
|                            | Meischke et al(3)             | M=2970, F=1527              | 1.26 (1.11-1.42)  |                     |                  |
|                            | Melberg et al(20)             | M=179, F=65                 | 1.17 (0.56-2.46)  |                     |                  |
|                            | O'Donnell et al(17)           | M=1402, F=545               | 1.33 (1.09-1.62)  | 1.33 (1.08-1.63)    |                  |
|                            | Plaza-Martin et al (28)       | M=749, F=307                | 2.06 (1.53-2.78)  |                     |                  |
|                            | Pelter et al(16)              | M=221, F=110                | 1.55 (0.91-2.65)  |                     |                  |
|                            | Sederholm Lawesson et al(25)  | M=406, F=126                | 0.98 (0.64-1.50)  | 1.04 (0.66-1.65)    |                  |
|                            | An et al(27)                  | M= 323, F= 483              | 1.00 (0.74-1.35)  | NS: OR not provided |                  |
|                            | Diaphoresis                   | Allana et al (26)           | M= 133, F= 116    | 0.85 (0.51-1.41)    |                  |
|                            |                               | Arslanian-Engoren et al(10) | M= 1258, F=536    | 0.67 (0.55-0.82)    | 0.76 (0.62-0.94) |
|                            |                               | Asgar Pour et al(22)        | M=183, F=137      | 0.98 (0.52-1.87)    |                  |
|                            |                               | Coventry et al(19)          | M= 1060, F=621    | 0.61 (0.43-0.85)    | 0.71 (0.50-1.01) |
|                            |                               | Culic et al (6)             | M=1395, F=601     | 0.62 (0.52-0.76)    | 0.73 (0.60-0.88) |
| DeVon et al(23)            |                               | M=343, F=131                | 0.94 (0.61-1.43)  | 0.96 (0.61-1.50)    |                  |
| Dey et al(12)              |                               | M=682, F=344                | 0.75 (0.56-1.01)  |                     |                  |

|                               |                               |                |                     |                     |
|-------------------------------|-------------------------------|----------------|---------------------|---------------------|
|                               | Goldberg et al(4)             | M=810, F=550   | 0.79 (0.64-0.98)    | 0.78 (0.62-1.00)    |
|                               | Grace et al(7)                | M=347, F=135   | 1.32 (0.88-1.96)    |                     |
|                               | Khan et al(21)                | M=710, F=305   | 0.77 (0.59-1.01)    |                     |
|                               | Kirchberger et al(13)         | M= 1710, F=568 | 0.91 (0.75-1.10)    | 0.93 (0.75-1.15)    |
|                               | Lichtman et al(24)            | M=976, F=2009  | 1.08 (0.74-1.58)    |                     |
|                               | Lovlien, Schei & Hole(11)     | M=384, F=149   | 1.08 (0.74-1.58)    | 1.29 (0.87-1.93)    |
|                               | Meischke et al(3)             | M=2970, F=1527 | 0.68 (0.60-0.77)    |                     |
|                               | Melberg et al (20)            | M=179, F=65    | 0.92 (0.50-1.69)    |                     |
|                               | Milner et al (5)              | M=127, F=90    | 1.45 (0.79-2.67)    |                     |
|                               | O'Donnell et al(17)           | M=1402, F=545  | NS: OR not provided | NS: OR not provided |
|                               | Pelter et al(16)              | M=221, F=110   | 0.91 (0.43-1.94)    |                     |
|                               | Sederholm Lawesson et al(25)  | M=406, F=126   | 1.20 (0.79-1.82)    | 1.40 (0.88-2.23)    |
| Nausea or vomiting            | Allana et al (26)             | M= 133, F=116  | 2.51 (1.50-4.18)    |                     |
|                               | An et al (27)                 | M= 323, F= 483 | 1.28 (0.93-1.76)    | NS: OR not provided |
|                               | Arslanian-Engoren et al(10)   | M=1258, F=536  | 1.24 (1.01-1.52)    | 1.48 (1.19-1.84)    |
|                               | Asgar Pour et al (22)         | M=183, F=137   | 1.29 (0.81-2.04)    |                     |
|                               | Coventry et al(19)            | M= 1060, F=621 | 1.55 (1.03-2.34)    | 1.57 (1.02-2.41)    |
|                               | Culic et al (6)               | M=1395, F=601  | 1.94 (1.60-2.36)    | 1.61 (1.33-1.96)    |
|                               | DeVon et al(23)               | M=343, F=131   | 1.52 (1.01-2.30)    | 1.72 (1.21-2.46)    |
|                               | Dey et al (12)                | M=682, F=344   | 1.63 (1.22-2.18)    |                     |
|                               | Goldberg et al(4)             | M=810, F=550   | 1.60 (1.28-2.02)    | 1.72 (1.33-2.22)    |
|                               | Grace et al(7)                | M=347, F=135   | 1.81 (1.19-2.73)    |                     |
|                               | Khan et al(21)                | M=710, F=305   | 1.85 (1.38-2.49)    |                     |
|                               | Kirchberger et al(13)         | M= 1710, F=568 | 1.90 (1.57-2.31)    | 2.23 (1.67-2.97)    |
|                               | Lovlien, Schei & Hole(11)     | M=384, F=149   | 2.14 (1.45-3.16)    | 2.38 (1.59-3.56)    |
|                               | Lovlien, Schei & Gjengedal(8) | M=44, F=38     | 3.72 (1.49-9.29)    |                     |
|                               | Meischke et al (3)            | M=2970, F=1527 | 1.45 (1.28-1.64)    |                     |
|                               | Melberg et al(20)             | M=179, F=65    | 1.32 (0.72-2.43)    |                     |
|                               | Milner et al (5)              | M=127, F=90    | 2.29 (1.19-4.42)    | 2.43 (1.23-4.79)    |
|                               | O'Donnell et al(17)           | M=1402, F=545  | 1.23 (0.98-1.53)    | 1.31 (1.04-1.65)    |
|                               | Sederholm Lawesson et al(25)  | M=406, F=126   | 2.39 (1.59-3.61)    | 3.04 (1.93-4.78)    |
| Fatigue                       | An et al(27)                  | M= 323, F= 483 | 1.51 (1.14-2.01)    | 1.39 (1.01-1.91)    |
|                               | Asgar Pour et al(22)          | M=183, F=137   | 0.85 (0.54-1.35)    |                     |
|                               | Coventry et al (19)           | M= 1060, F=621 | 2.13 (1.28-3.56)    |                     |
|                               | DeVon et al(23)               | M=343, F=131   | 1.13 (0.75-1.70)    | 1.04 (0.67-1.62)    |
|                               | Grace et al(7)                | M=347, F=135   | 1.24 (0.81-1.90)    |                     |
|                               | Khan et al(21)                | M=710, F=305   | 1.57 (1.19-2.05)    |                     |
|                               | Lichtman et al (24)           | M=976, F=2009  | 1.19 (1.02-1.39)    |                     |
|                               | Lovlien, Schei & Hole(11)     | M=384, F=149   | 1.36 (0.93-2.00)    | 1.43 (0.97-2.11)    |
|                               | Milner et al (5)              | M=127, F=90    | 2.07 (0.93-4.63)    |                     |
|                               | O'Donnell et al(17)           | M=1402, F=545  | 1.49 (1.19-1.87)    | 1.64 (1.30-2.08)    |
|                               | Sederholm Lawesson et al(25)  | M=406, F=126   | 1.43 (0.94-2.16)    | 1.31 (0.84-2.06)    |
| Dizziness or light-headedness | An et al(27)                  | M= 323, F=483  | 1.53 (1.14-2.07)    | 1.83 (1.31-2.58)    |
|                               | Culic et al (6)               | M=1395, F=601  | 1.39 (0.96-2.03)    | 1.22 (0.84-1.75)    |
|                               | DeVon et al(23)               | M=343, F=131   | 1.29 (0.86-1.95)    | 1.26 (0.81-1.96)    |
|                               | Grace et al(7)                | M=347, F=135   | 1.70 (1.08-2.67)    |                     |
|                               | Lovlien, Schei & Hole(11)     | M=384, F=149   | 1.32 (0.89-1.95)    | 1.54 (1.03-2.32)    |
|                               | Lichtman et al(24)            | M=976, F=2009  | 1.09 (0.92-1.29)    |                     |
|                               | Khan et al(21)                | M=710, F=305   | 1.17 (0.86-1.58)    |                     |
|                               | Kirchberger et al(13)         | M= 1710, F=568 | 1.36 (1.08-1.70)    | 1.49 (1.16-1.91)    |
|                               | Milner et al (5)              | M=127, F=90    | 1.21 (0.61-2.38)    |                     |
| Indigestion                   | An et al (27)                 | M= 323, F= 483 | 1.42 (0.66-3.06)    | NS: OR not provided |
|                               | Asgar Pour et al(22)          | M=183, F=137   | 0.74 (0.43-1.28)    |                     |
|                               | DeVon et al (23)              | M=343, F=131   | 1.51 (0.96-2.38)    | 1.40 (0.86-2.27)    |
|                               | Grace et al(7)                | M=347, F=135   | 1.32 (0.82-2.14)    |                     |
|                               | Milner et al(5)               | M=127, F=90    | 2.13 (1.03-4.44)    | 2.13 (1.01-4.53)    |
|                               | O'Donnell et al(17)           | M=1402, F=545  | NS: OR not provided | NS: OR not provided |
| Palpitations                  | Allana et al(26)              | M=133, F=116   | 2.11 (1.26-3.52)    |                     |
|                               | An et al(27)                  | M= 323, F=483  | 1.63 (1.11-2.41)    | NS: OR not provided |
|                               | Asgar Pour et al(22)          | M=183, F=137   | 1.41 (0.85-2.35)    |                     |
|                               | DeVon et al(23)               | M=343, F=131   | 1.72 (1.06-2.79)    | 1.54 (1.05-2.25)    |
|                               | Dey et al(12)                 | M=682, F=344   | 1.46 (0.82-2.61)    |                     |
|                               | Lichtman et al(24)            | M=976, F=2009  | 1.61 (1.29-2.01)    |                     |
|                               | Lovlien, Schei & Hole(11)     | M=384, F=149   | 2.77 (1.82-4.22)    | 3.14 (2.02-4.88)    |
|                               | Milner et al (5)              | M=127, F=90    | 3.42 (1.02-11.47)   |                     |
|                               | O'Donnell et al(17)           | M=1402, F=545  | 2.04 (1.25-3.31)    | 2.18 (1.31-3.63)    |

|                           |                              |                |                  |                     |
|---------------------------|------------------------------|----------------|------------------|---------------------|
|                           | Plaza-Martin et al(28)       | M=749, F=307   | 3.05 (1.52-6.13) |                     |
| Fear                      | Kirchberger et al(13)        | M= 1710, F=568 | 2.03 (1.66-2.49) | 2.17 (1.73-2.72)    |
|                           | O'Donnell et al(17)          | M=1402, F=545  | 1.32 (0.98-1.78) | 1.47 (1.08-2.01)    |
|                           | Sederholm Lawesson et al(25) | M=406, F=126   | 2.19 (1.39-3.46) | 2.65 (1.59-4.41)    |
| Syncope                   | Allana et al(26)             | M=133, F=116   | 0.95 (0.28-3.21) |                     |
|                           | Coventry et al(19)           | M= 1060, F=621 | 1.41 (0.97-2.05) | 1.42 (0.96-2.10)    |
|                           | Dey et al(12)                | M=682, F=344   | 1.06 (0.77-1.45) |                     |
|                           | Goldberg et al(4)            | M=810, F=550   | 1.27 (0.87-1.86) | 0.88 (0.56-1.41)    |
|                           | Grace et al(7)               | M=347, F=135   | 1.09 (0.46-2.55) |                     |
|                           | Kirchberger et al(13)        | M= 1710, F=568 | 1.41 (0.95-2.09) | 1.55 (1.00-2.39)    |
|                           | Lovlien, Schei & Hole(11)    | M=384, F=149   | 2.04 (1.11-3.77) | 2.34 (1.25-4.40)    |
|                           | Meischke et al (3)           | M=2970, F=1527 | 1.23 (0.85-1.77) |                     |
|                           | Melberg et al(20)            | M=179, F=65    | 0.95 (0.42-2.14) |                     |
|                           | Sederholm Lawesson et al(25) | M=406, F=126   | 0.98 (0.62-1.54) | 0.96 (0.58-1.58)    |
|                           | Tunstall-Pedoe et al(2)      | M=3991, F=1551 | 1.31 (0.94-1.83) |                     |
|                           | Headache                     | An et al (27)  | M= 323, F= 483   | 1.67 (0.98-2.83)    |
| Culic et al(6)            |                              | M=1395, F=601  | 2.63 (1.85-3.85) | 2.04 (1.45-2.86)    |
| Khan et al(21)            |                              | M=710, F=305   | 1.54 (1.10-2.15) |                     |
| Lovlien, Schei & Hole(11) |                              | M=384, F=149   | 1.25 (0.76-2.04) | 1.46 (0.88-2.44)    |
| Hot flushes               | An et al (27)                | M= 323, F= 483 | 1.14 (0.60-2.14) | NS: OR not provided |
|                           | Khan et al(21)               | M=710, F=305   | 1.51 (1.16-1.98) |                     |
|                           | Lovlien, Schei & Hole(11)    | M=384, F=149   | 1.47 (0.95-2.25) | 1.63 (1.00-2.54)    |
| Cough                     | An et al (27)                | M= 323, F= 483 | 0.74 (0.38-1.44) | NS: OR not provided |
|                           | Culic et al(6)               | M=1395, F=601  | 2.08 (1.54-2.78) | 1.59 (1.19-2.08)    |

OR: Odds ratio CI: confidence interval, M=male, F=female.

**Table S5. Meta-regression showing effects of age on the odds ratio of the symptom being present in women relative to men.**

|                                   | Age ≤ 65 years   | Age > 65 years   | p-value |
|-----------------------------------|------------------|------------------|---------|
|                                   | OR (95%CI)       | OR (95%CI)       |         |
| <i>Symptom</i>                    |                  |                  |         |
| Chest pain                        | 0.79 (0.68-0.91) | 0.64 (0.55-0.75) | 0.06    |
| Diaphoresis                       | 0.90 (0.78-1.05) | 0.76 (0.66-0.88) | 0.14    |
| Dizziness or lightheadedness*     |                  |                  |         |
| Fatigue†                          | 1.32 (1.17-1.48) | 1.74 (1.27-2.38) | 0.11    |
| Indigestion*                      |                  |                  |         |
| Jaw pain                          | 1.68 (1.29-2.20) | 1.97 (1.37-2.85) | 0.57    |
| Left arm or left shoulder pain    | 1.21 (1.10-1.34) | 0.89 (0.58-1.37) | 0.10    |
| Nausea or vomiting                | 1.45 (1.32-1.59) | 1.74 (1.53-1.98) | 0.49    |
| Neck pain*                        |                  |                  |         |
| Pain between the shoulder blades  | 2.12 (1.89-2.37) | 2.28 (1.78-2.92) | 0.59    |
| Palpitations                      | 1.72 (1.33-2.23) | 2.24 (1.25-4.00) | 0.42    |
| Shortness of breath               | 1.40 (1.23-1.59) | 1.27 (1.10-1.47) | 0.33    |
| Stomach or epigastric pain        | 1.34 (0.94-1.92) | 1.08 (0.75-1.54) | 0.40    |
| Syncope                           | 1.35 (1.09-1.68) | 1.18 (1.00-1.40) | 0.34    |
| Right arm or right shoulder pain* |                  |                  |         |

\*Less than 10 studies reported on this symptom, no meta-regression analysis performed

OR = odds ratio; 95%CI = 95% confidence interval



Figure S1. Funnel plot for pooled odds ratio of chest pain.

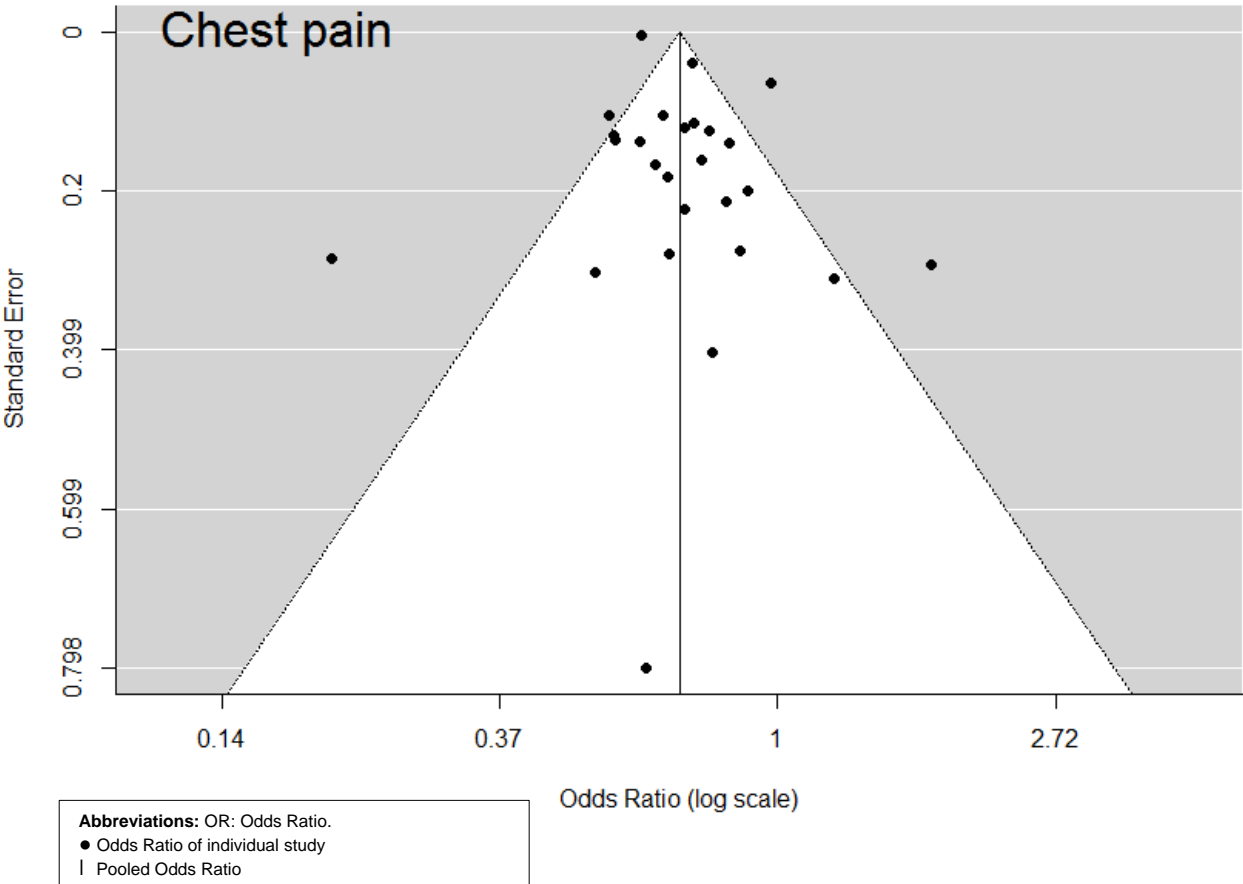

Figure S2. Funnel plot for pooled odds ratio of fatigue.

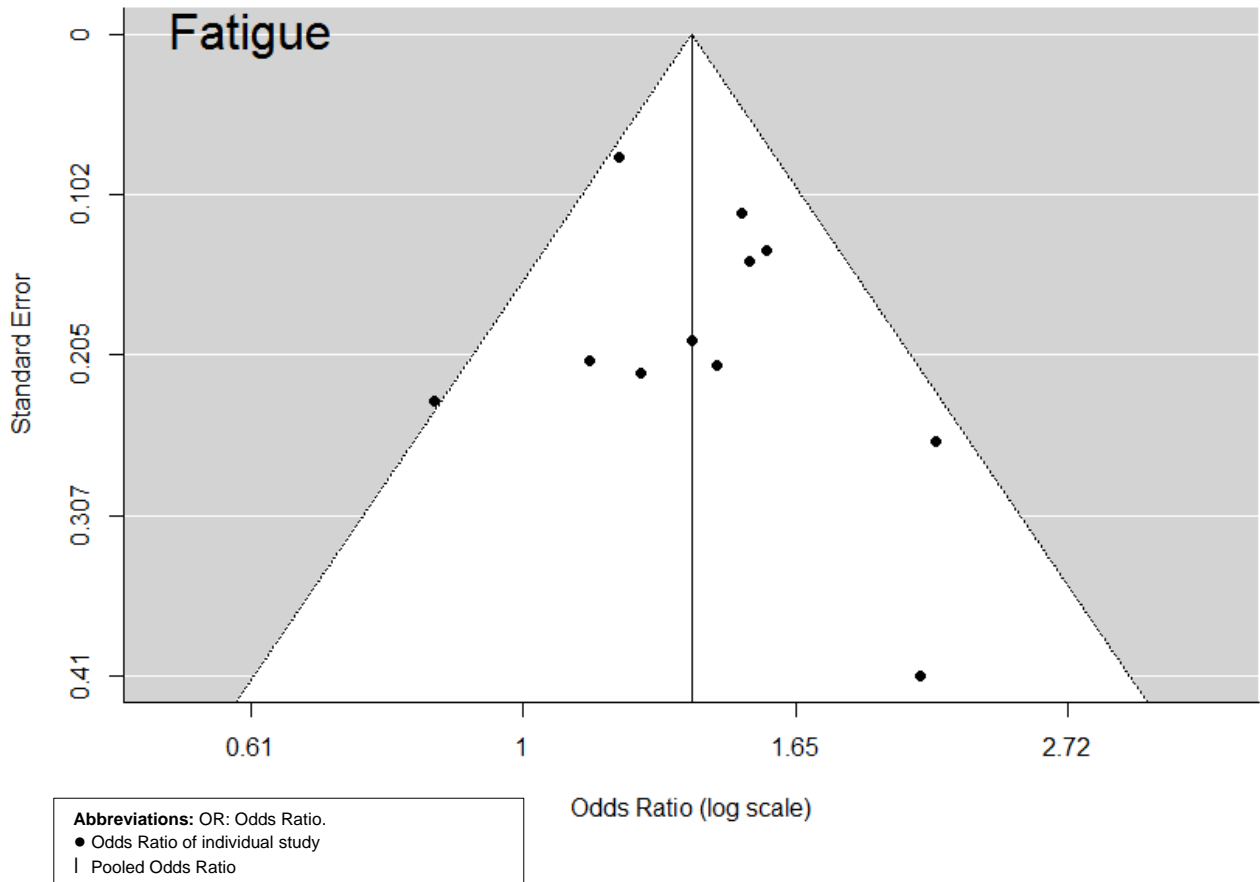

Figure S3. Funnel plot for pooled odds ratio of jaw pain.

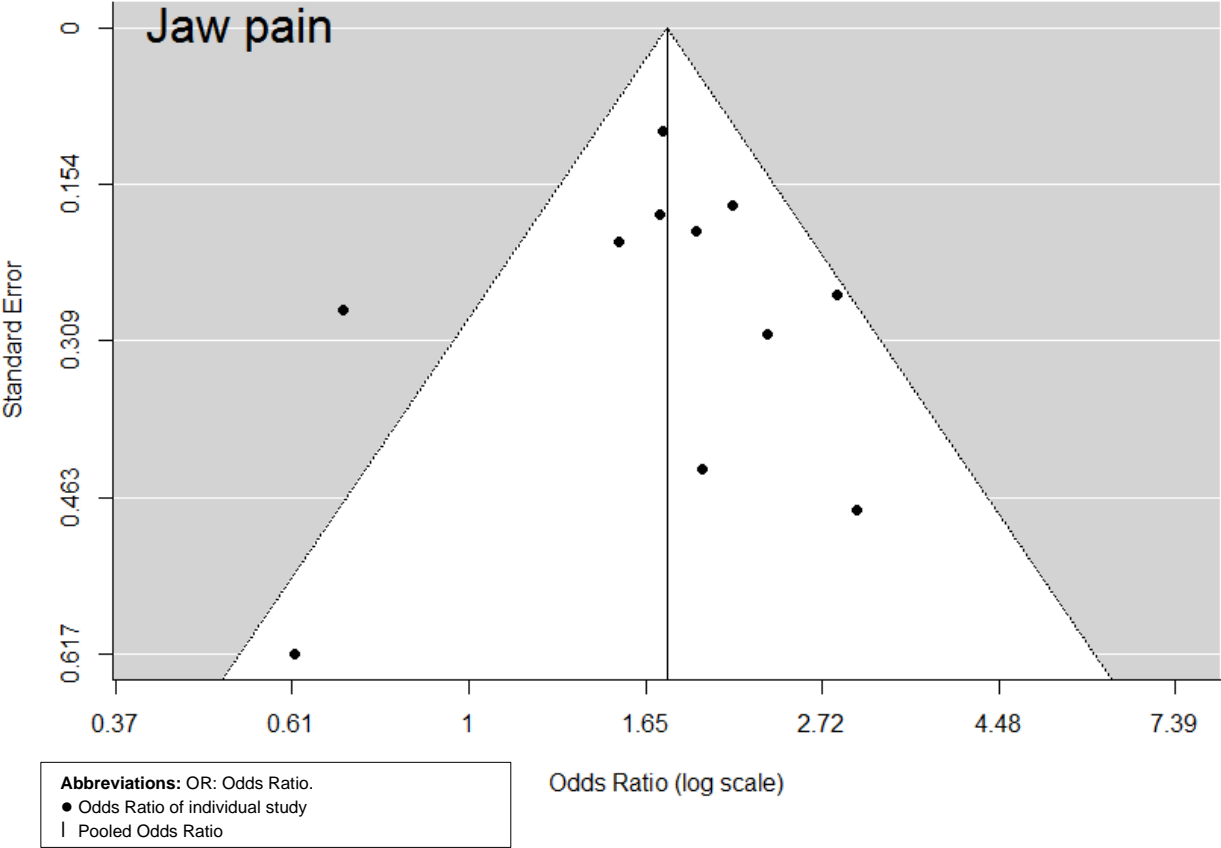

**Figure S4. Funnel plot for pooled odds ratio of left arm or left shoulder pain.**

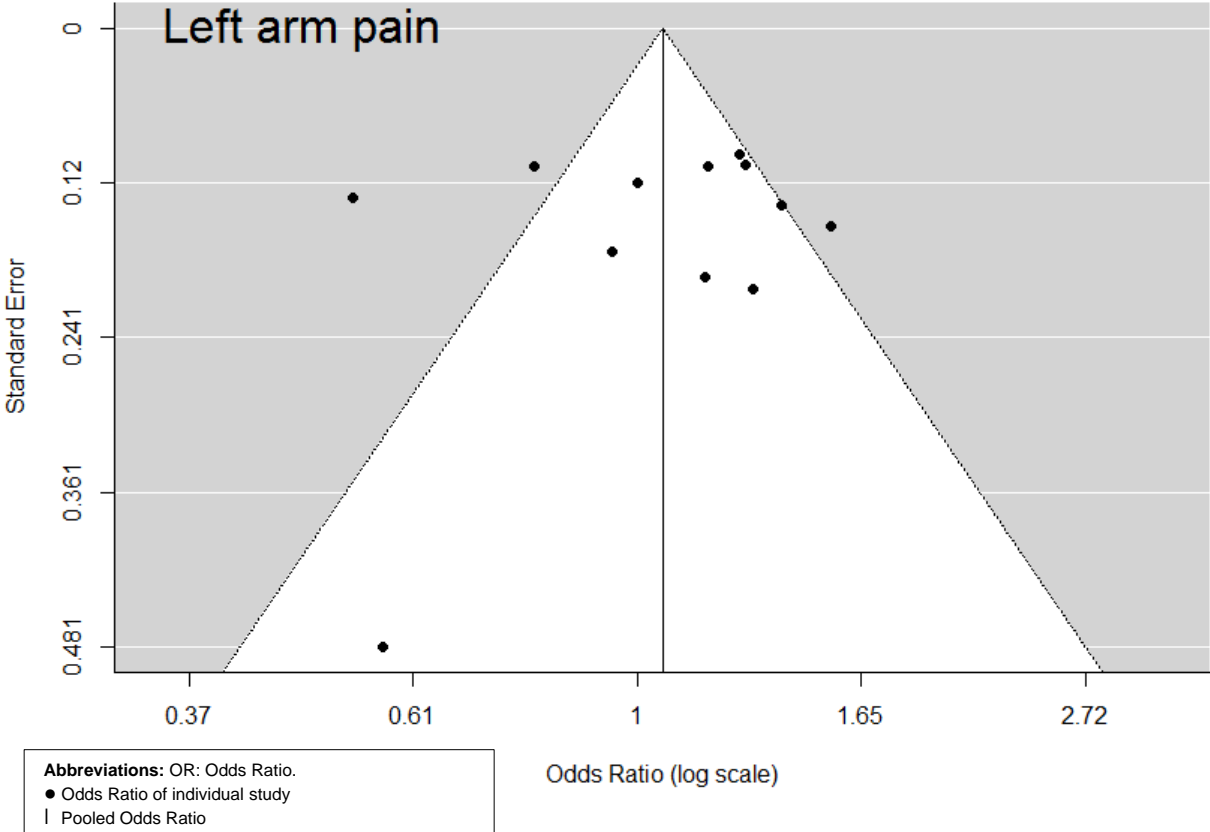

Figure S5. Funnel plot for pooled odds ratio of nausea or vomiting.

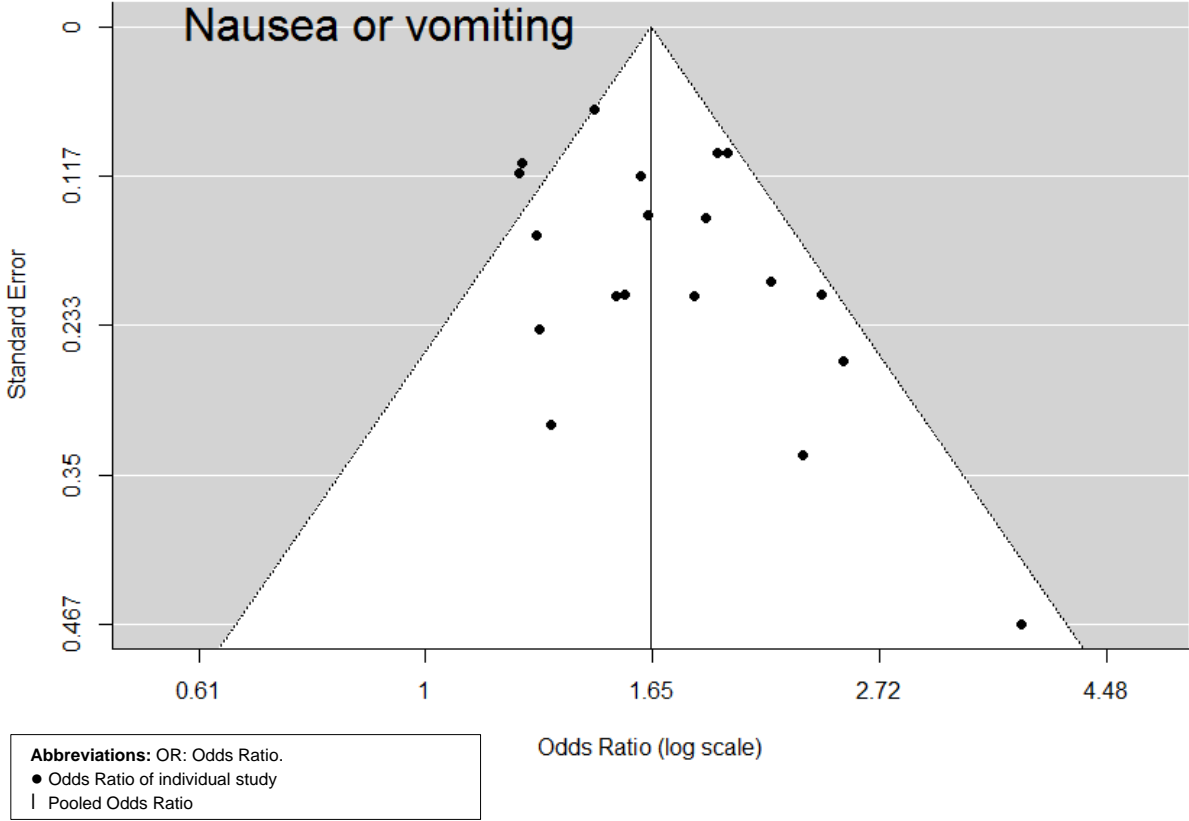

Figure S6. Funnel plot for pooled odds ratio of pain between shoulder blades.

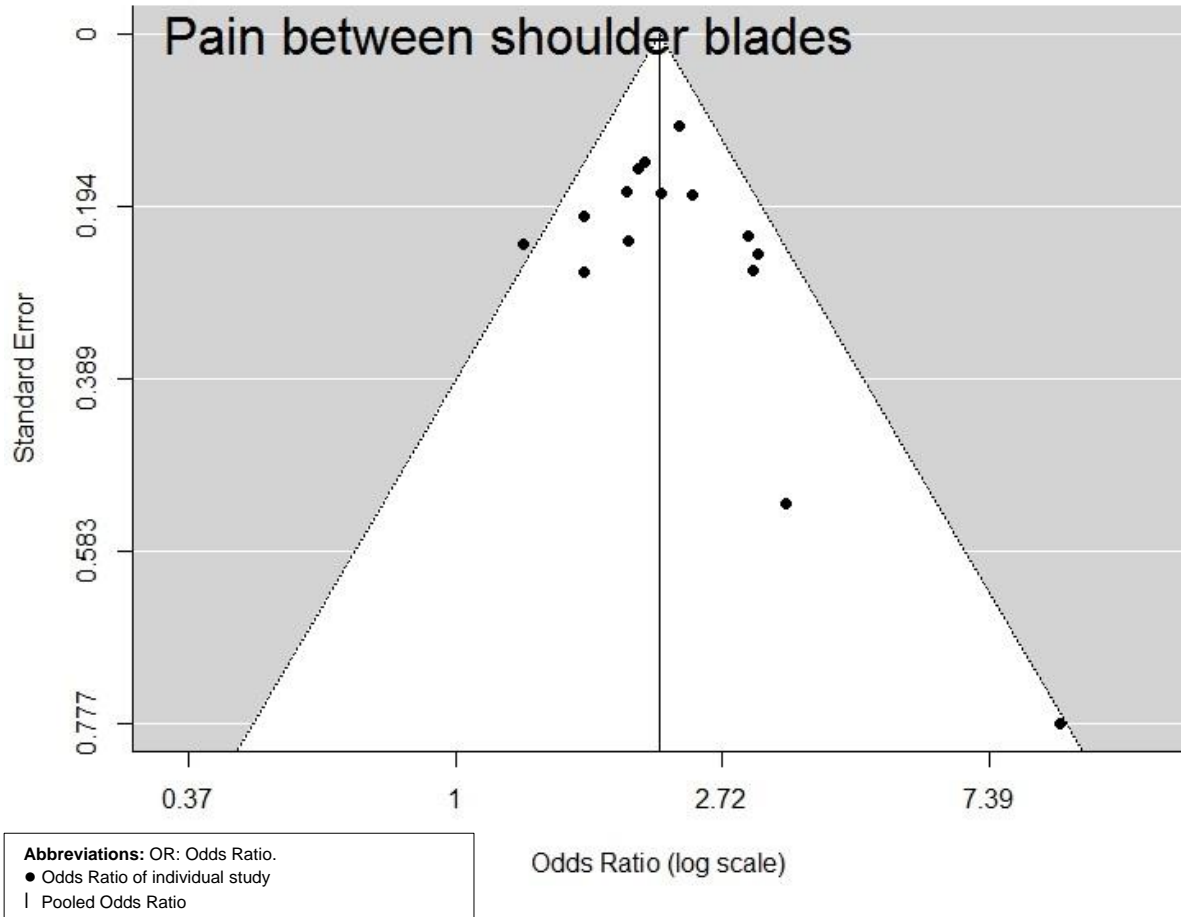

Figure S7. Funnel plot for pooled odds ratio of palpitations.

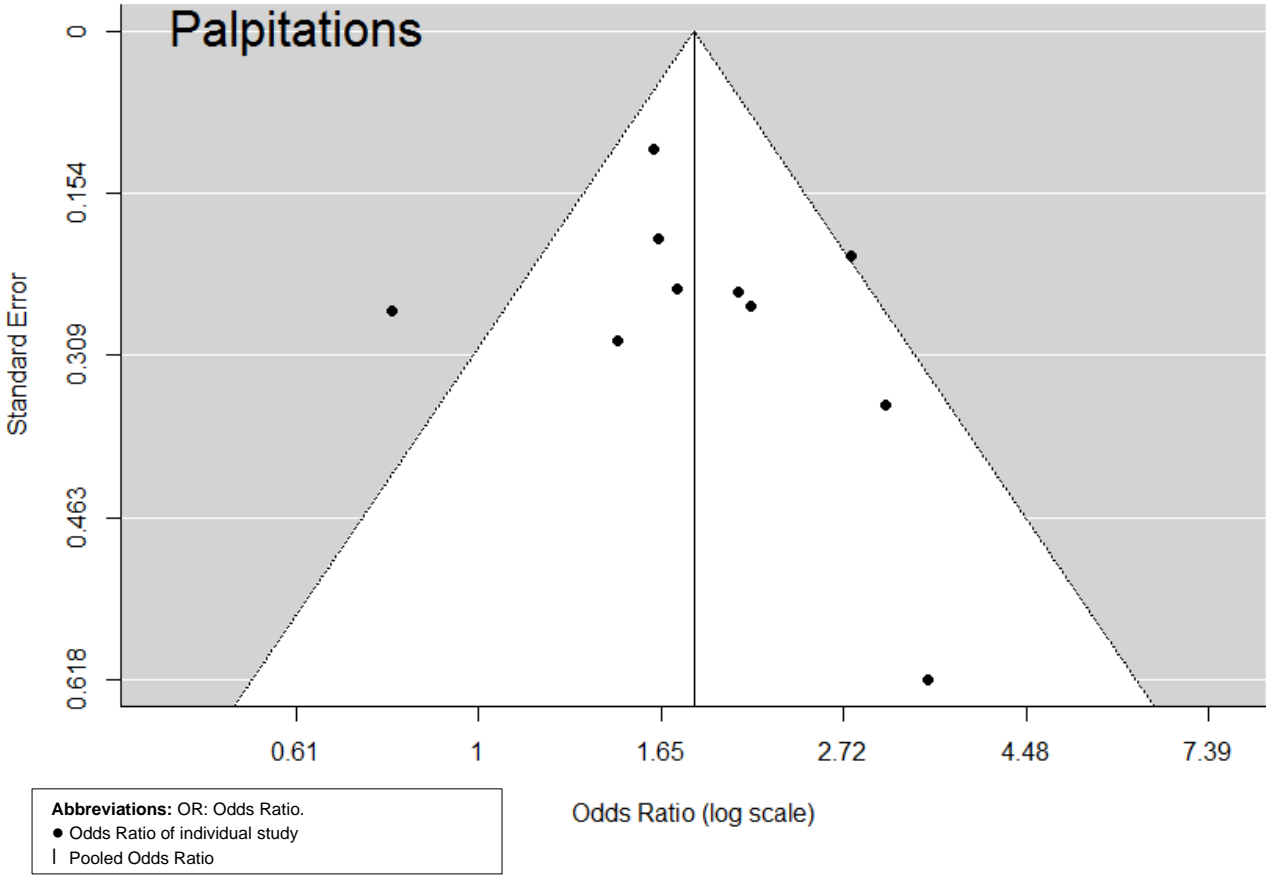

Figure S8. Funnel plot for pooled odds ratio of shortness of breath.

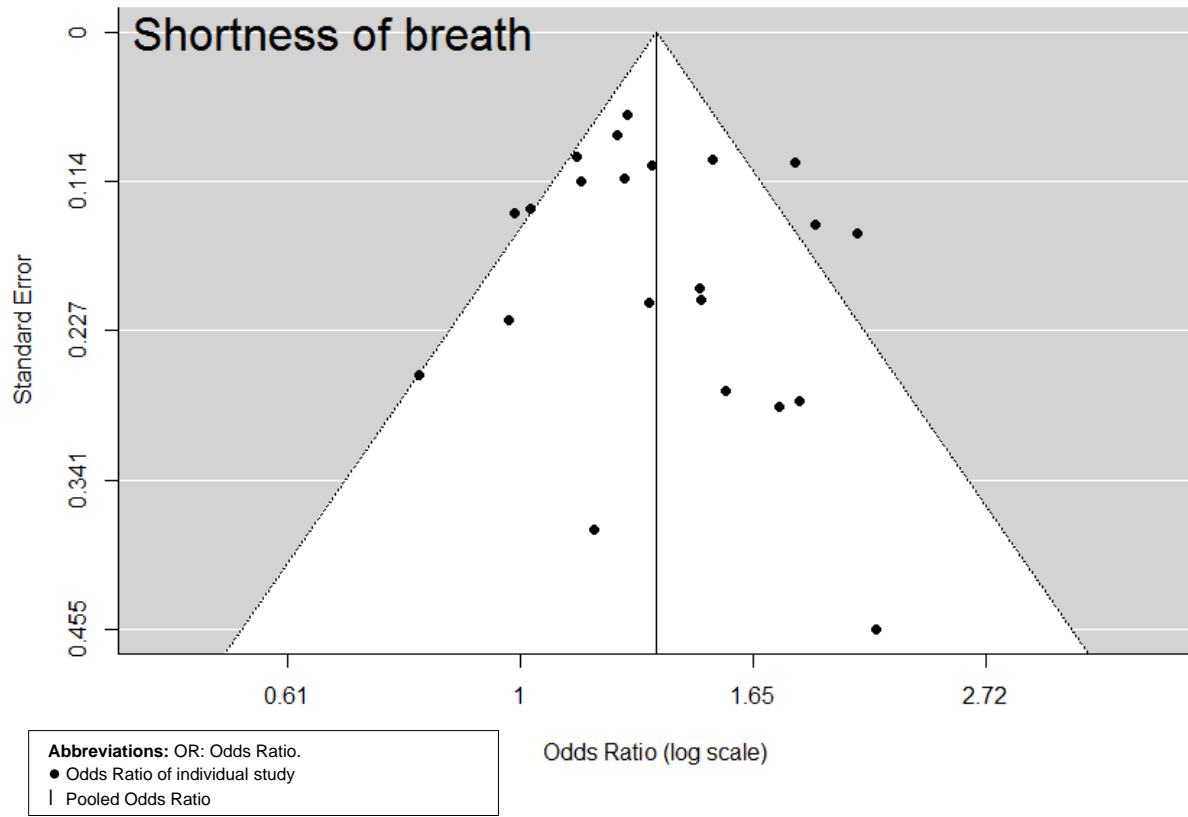



Figure S9. Funnel plot for pooled odds ratio of stomach or epigastric pain.

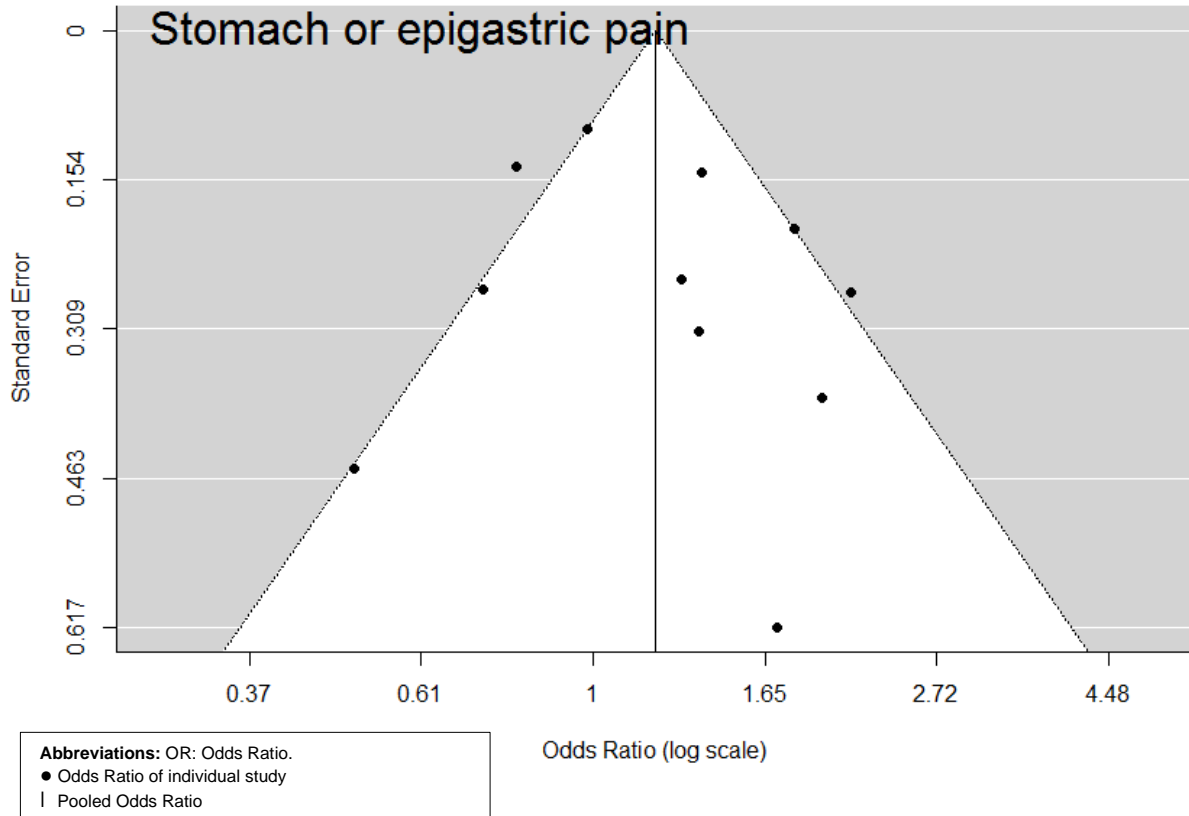

Figure S10. Funnel plot for pooled odds ratio of syncope.

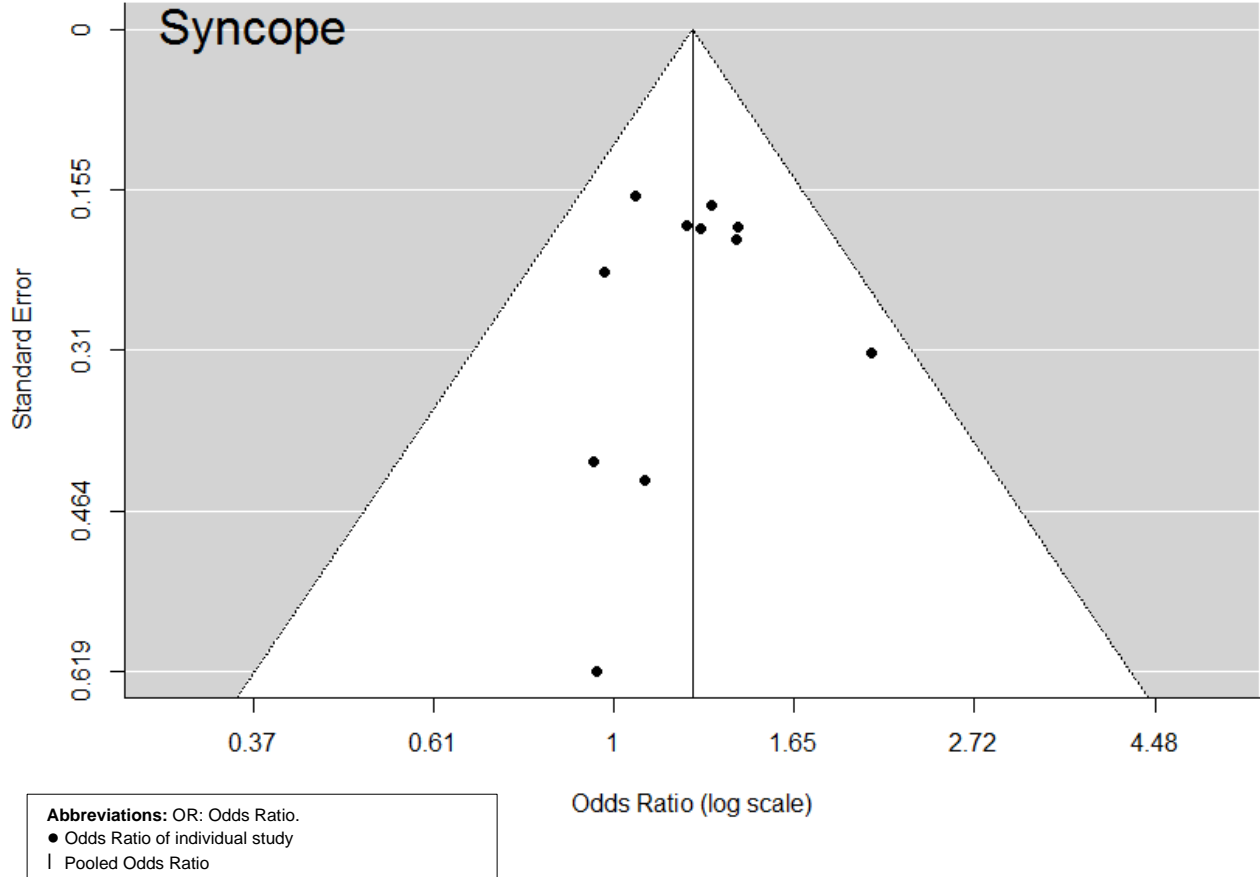

Figure S11. Funnel plot for pooled odds ratio of diaphoresis.

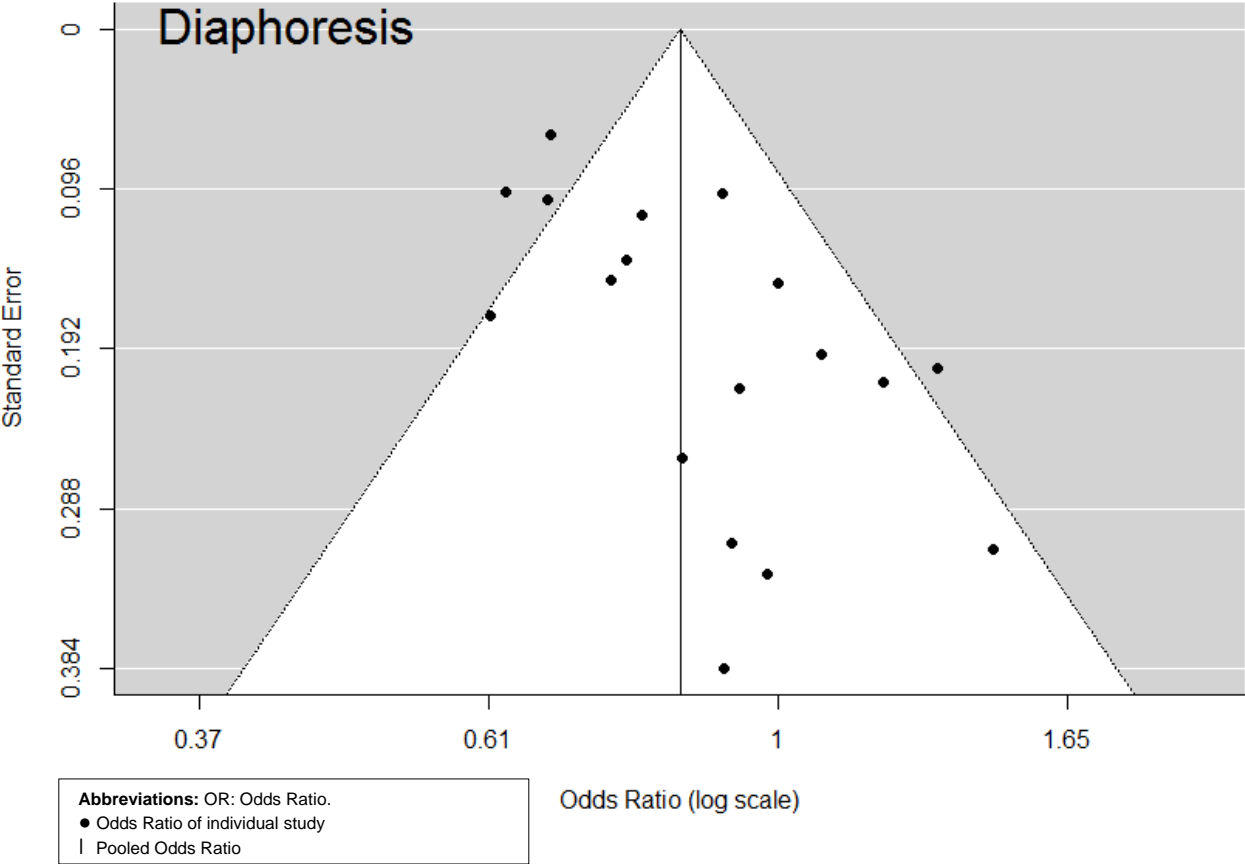

**Figure S12. Results of the aggregated meta-analysis for chest pain as a symptom of ACS in women relative to men summarised in a forest plot.**

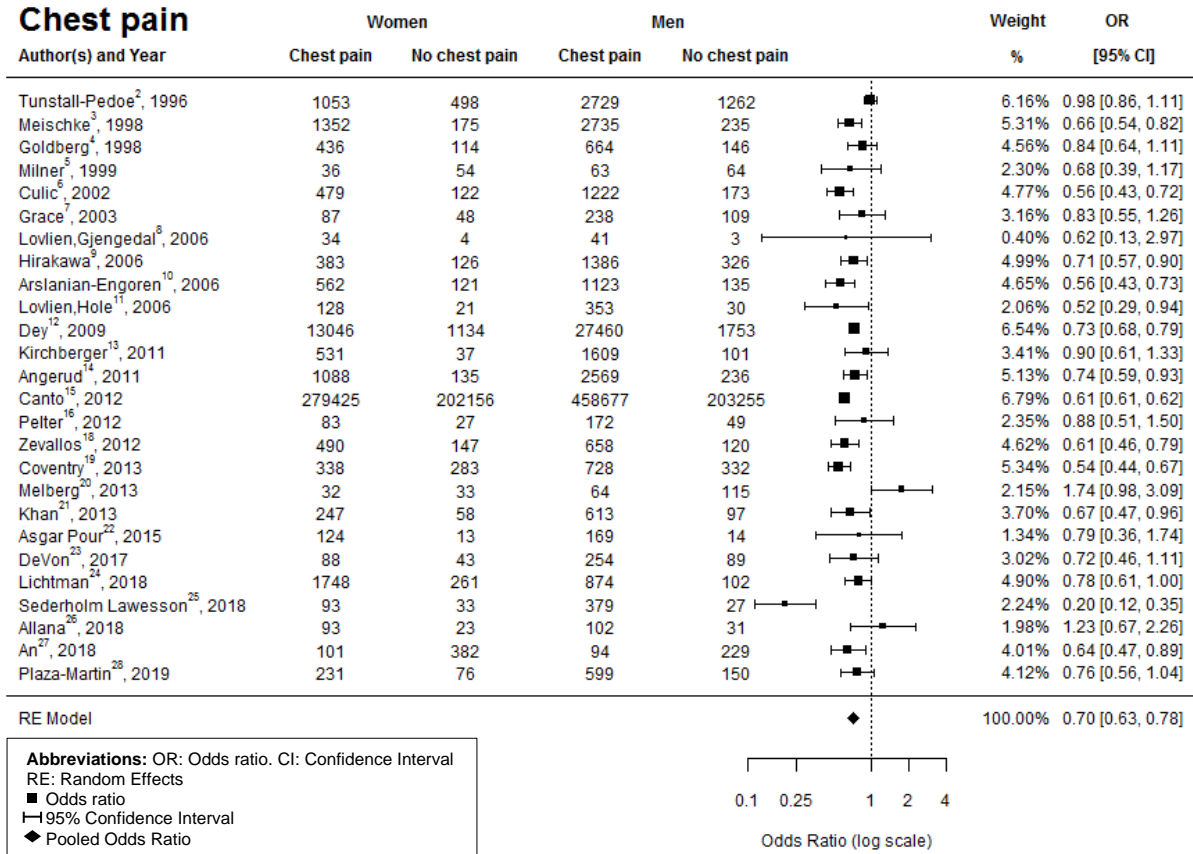

**Figure S13. Results of the aggregated meta-analysis for diaphoresis as a symptom of ACS in women relative to men summarised in a forest plot.**

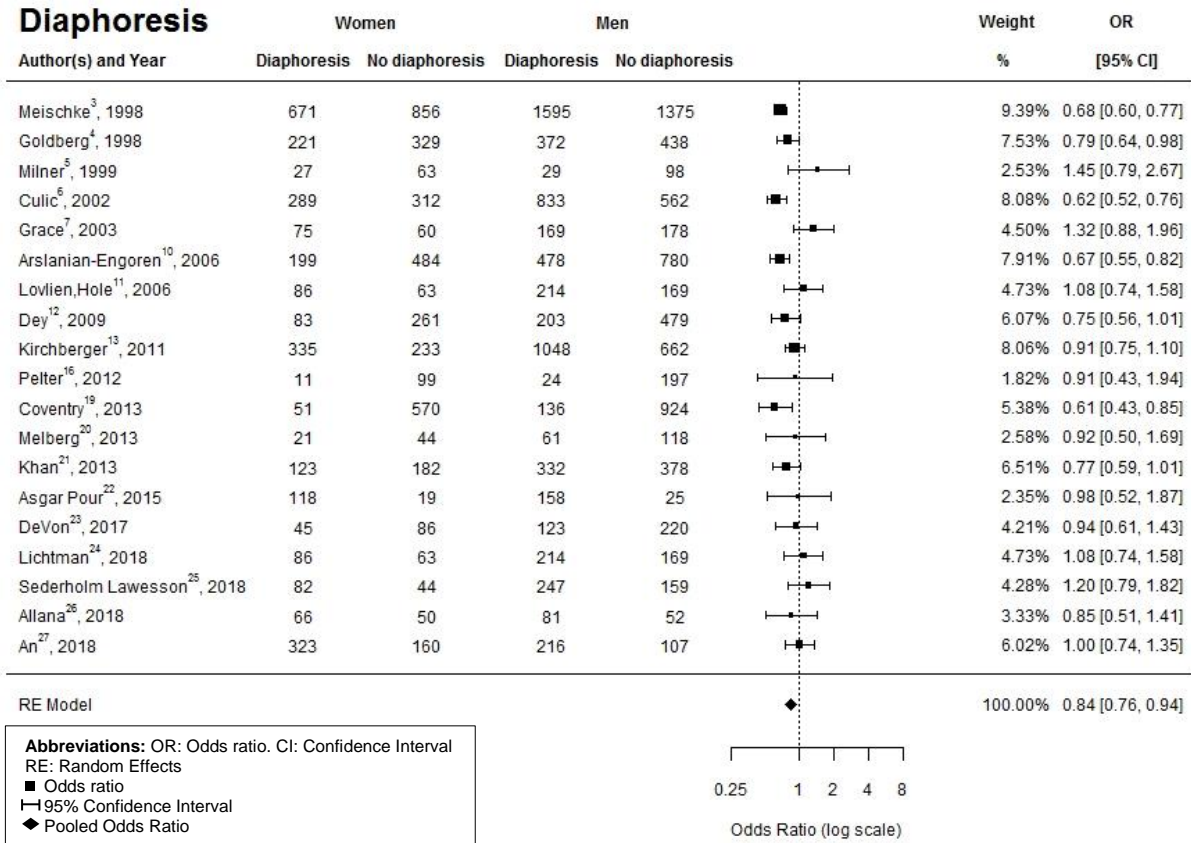

**Figure S14. Results of the aggregated meta-analysis for dizziness or light-headedness as a symptom of ACS in women relative to men summarised in a forest plot.**

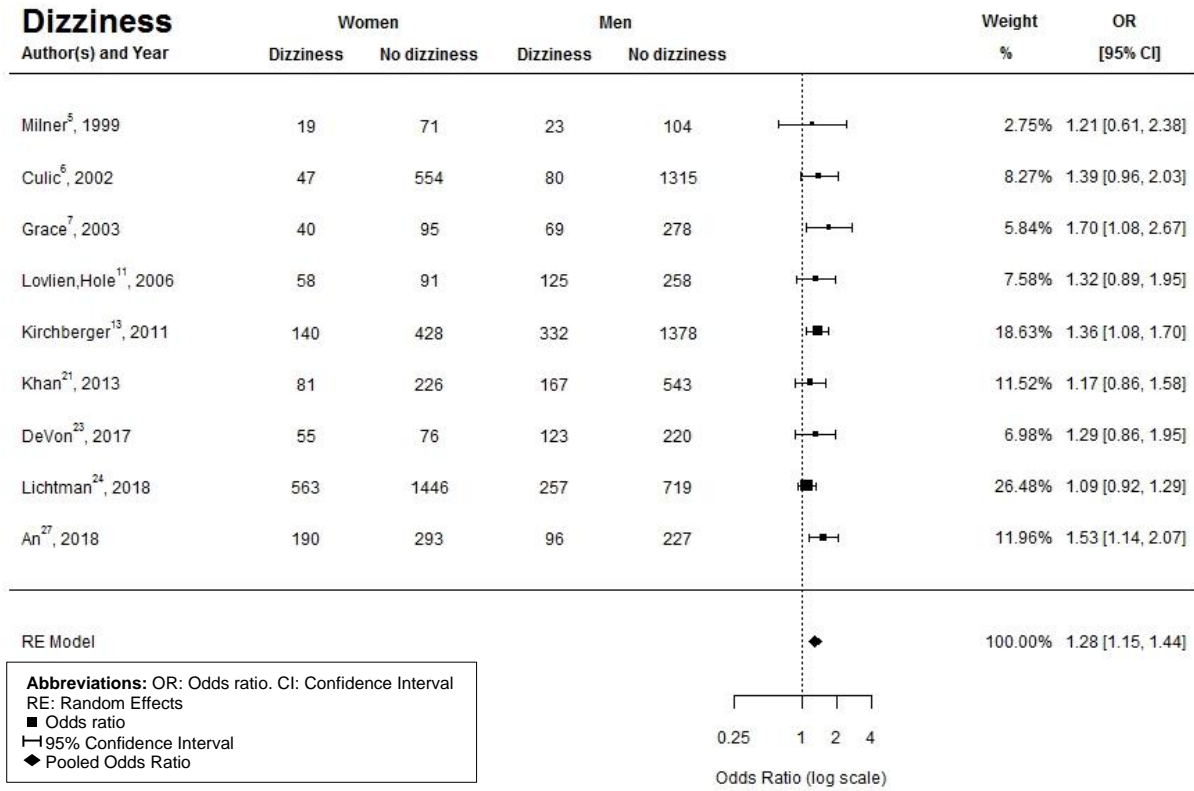

**Figure S15. Results of the aggregated meta-analysis for fatigue as a symptom of ACS in women relative to men summarised in a forest plot.**

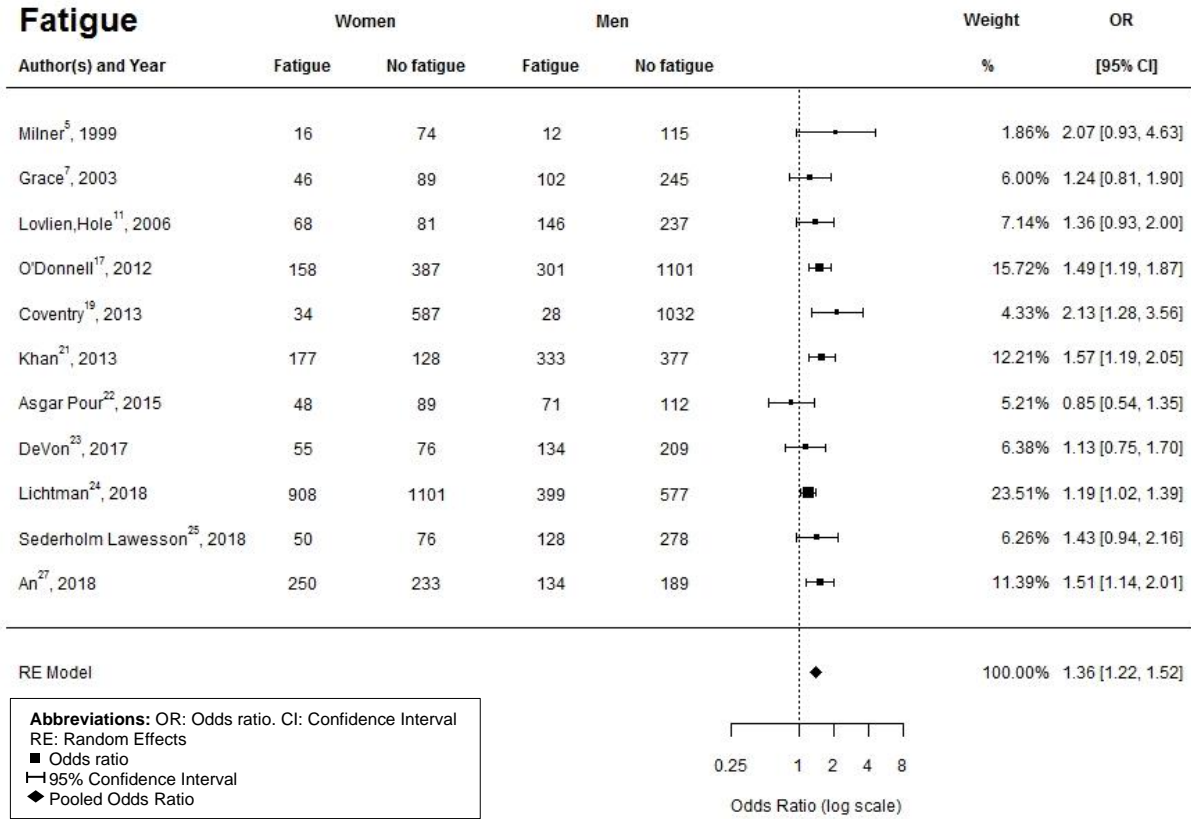

**Figure S16. Results of the aggregated meta-analysis for indigestion as a symptom of ACS in women relative to men summarised in a forest plot.**

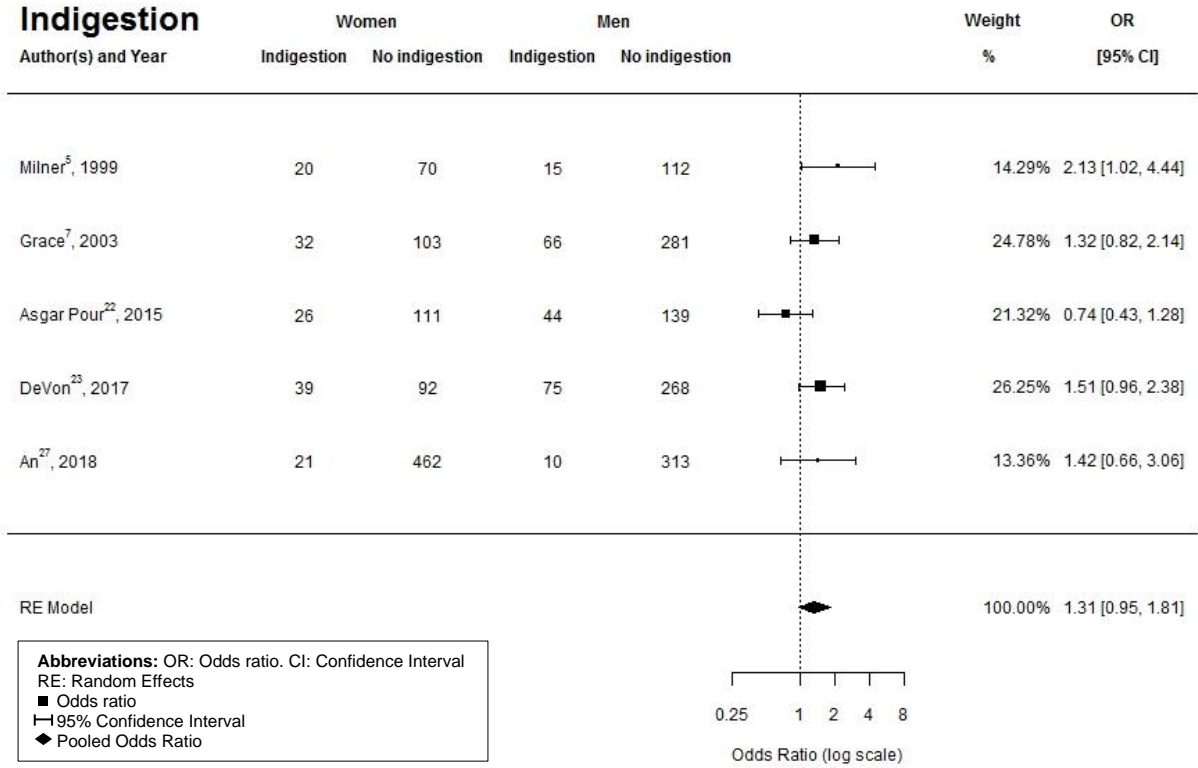



**Figure S17. Results of the aggregated meta-analysis for jaw pain as a symptom of ACS in women relative to men summarised in a forest plot.**

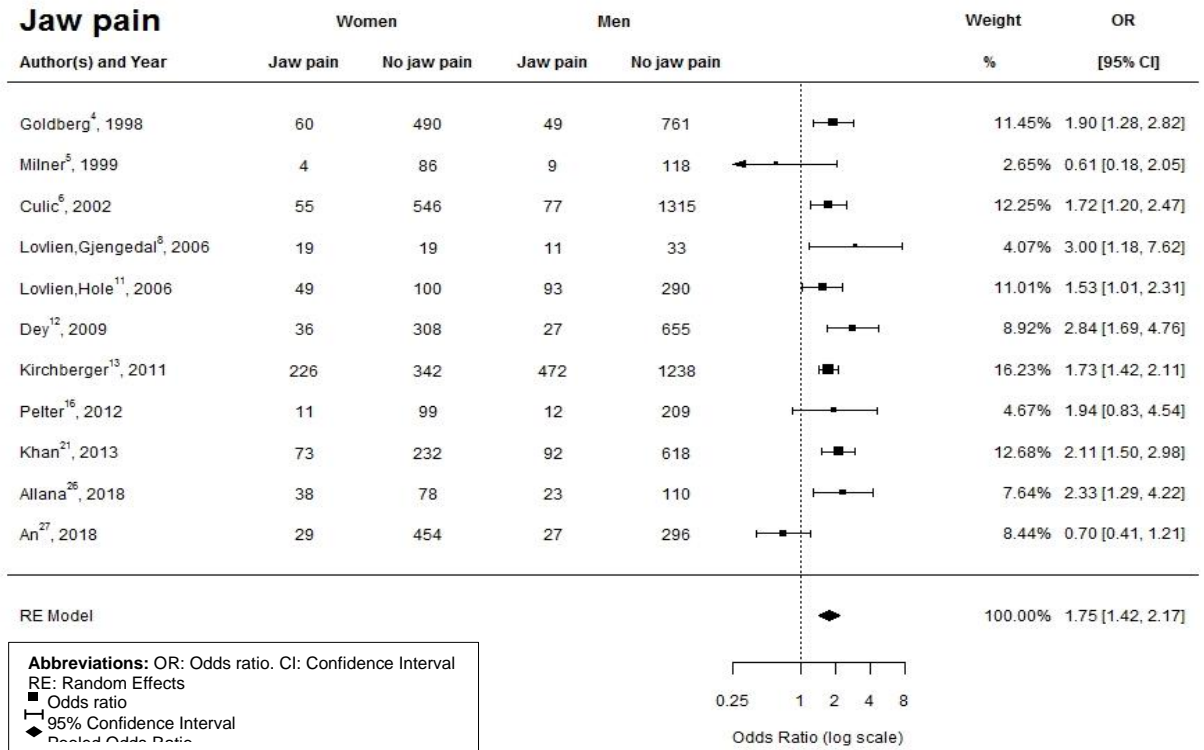

**Figure S18. Results of the aggregated meta-analysis for left arm pain or left shoulder pain as a symptom of ACS in women relative to men summarised in a forest plot.**

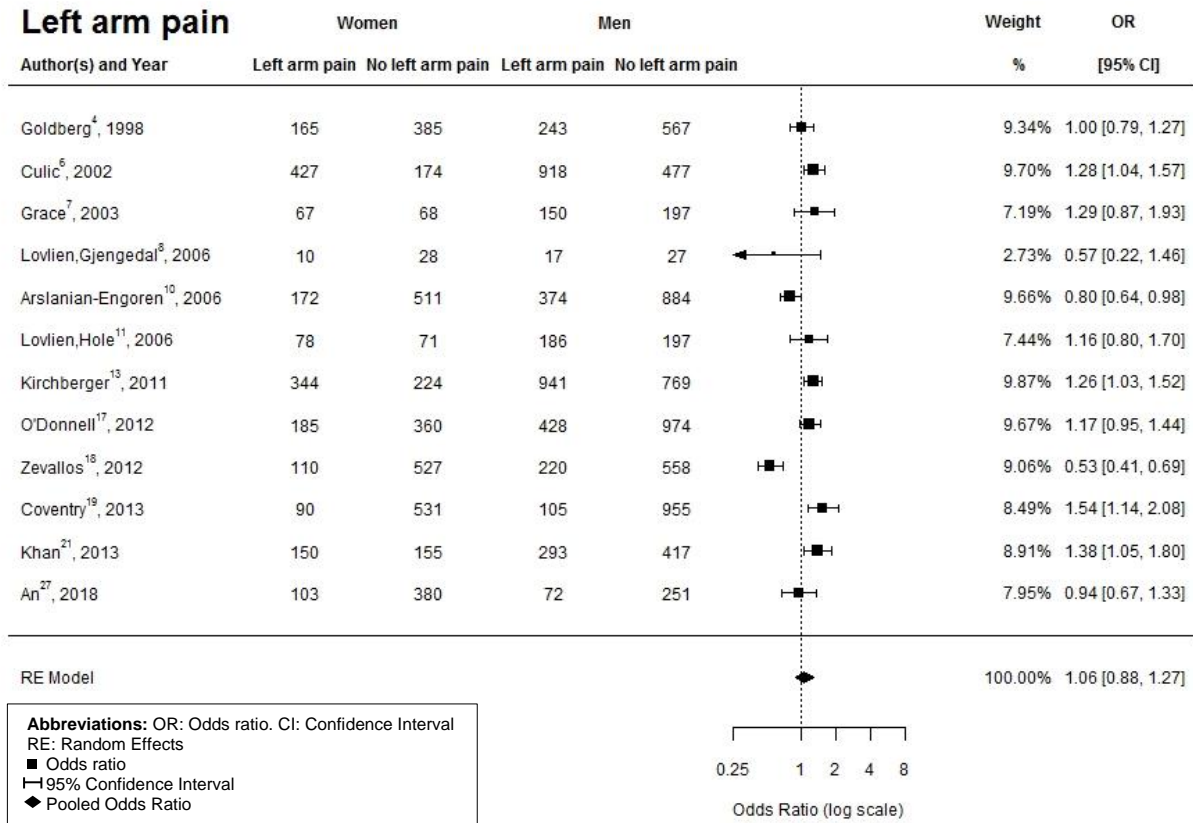

**Figure S19. Results of the aggregated meta-analysis for nausea or vomiting as a symptom of ACS in women relative to men summarised in a forest plot.**

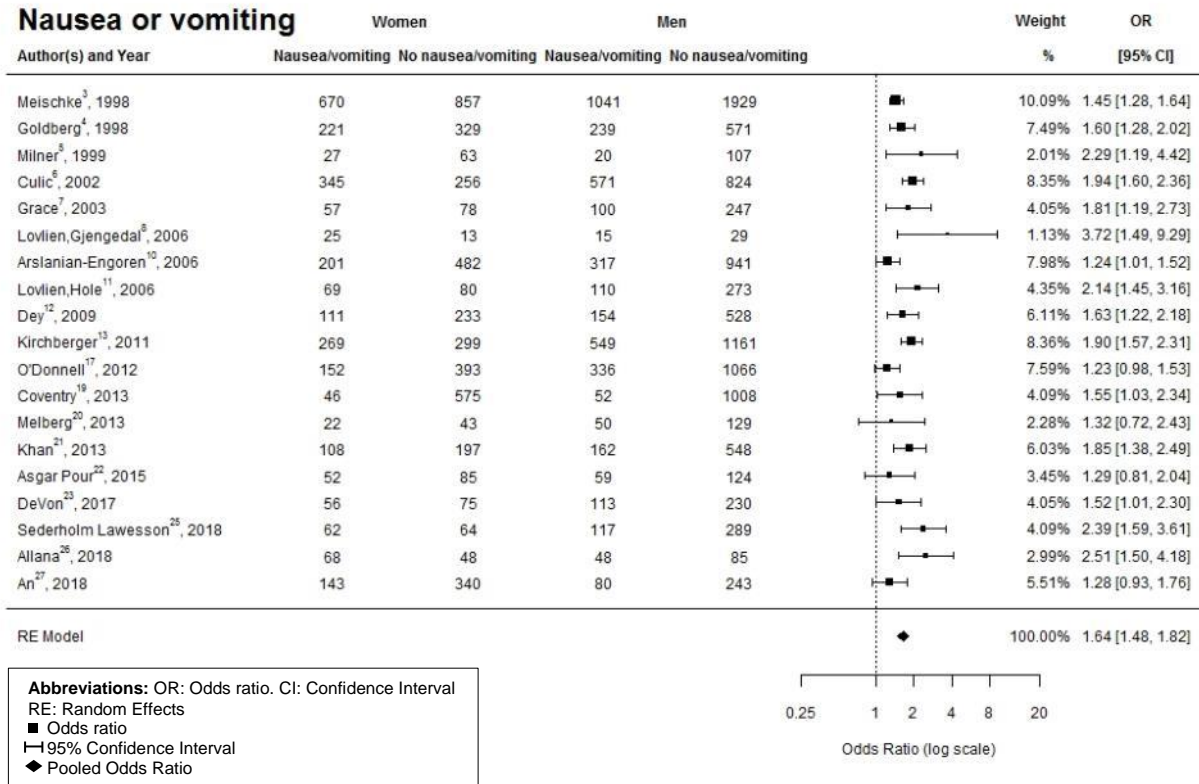

**Figure S20. Results of the aggregated meta-analysis for neck pain as a symptom of ACS in women relative to men summarised in a forest plot.**

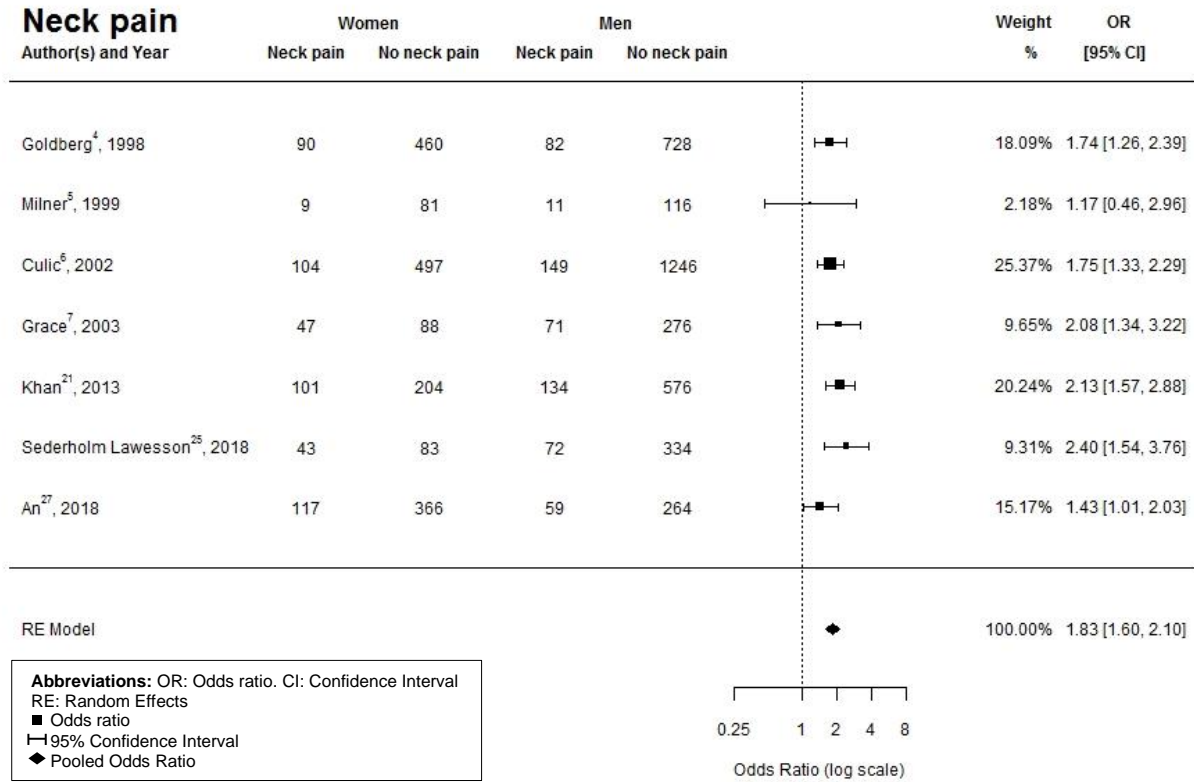

**Figure S21. Results of the aggregated meta-analysis for pain between shoulder blades as a symptom of ACS in women relative to men summarised in a forest plot.**

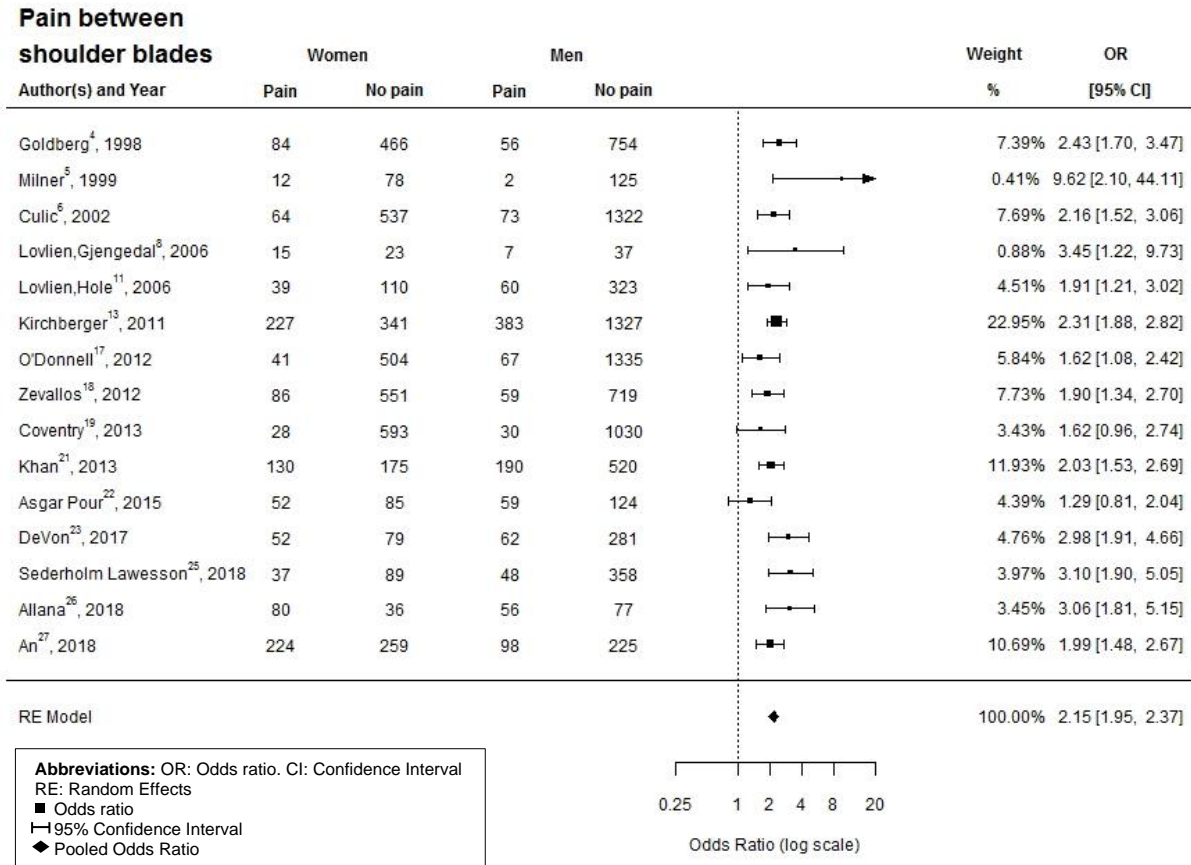

**Figure S22. Results of the aggregated meta-analysis for palpitations as a symptom of ACS in women relative to men summarised in a forest plot.**

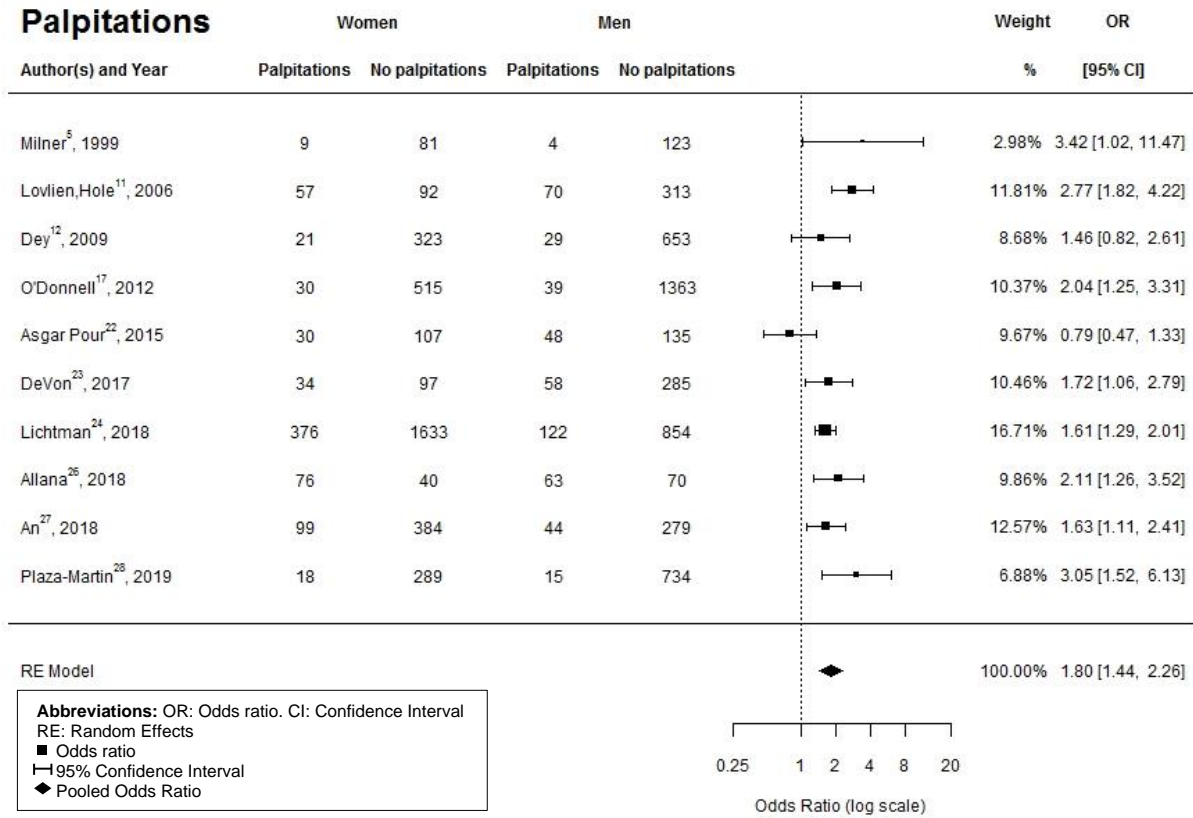

**Figure S23. Results of the aggregated meta-analysis for right arm pain or right shoulder pain as a symptom of ACS in women relative to men summarised in a forest plot.**

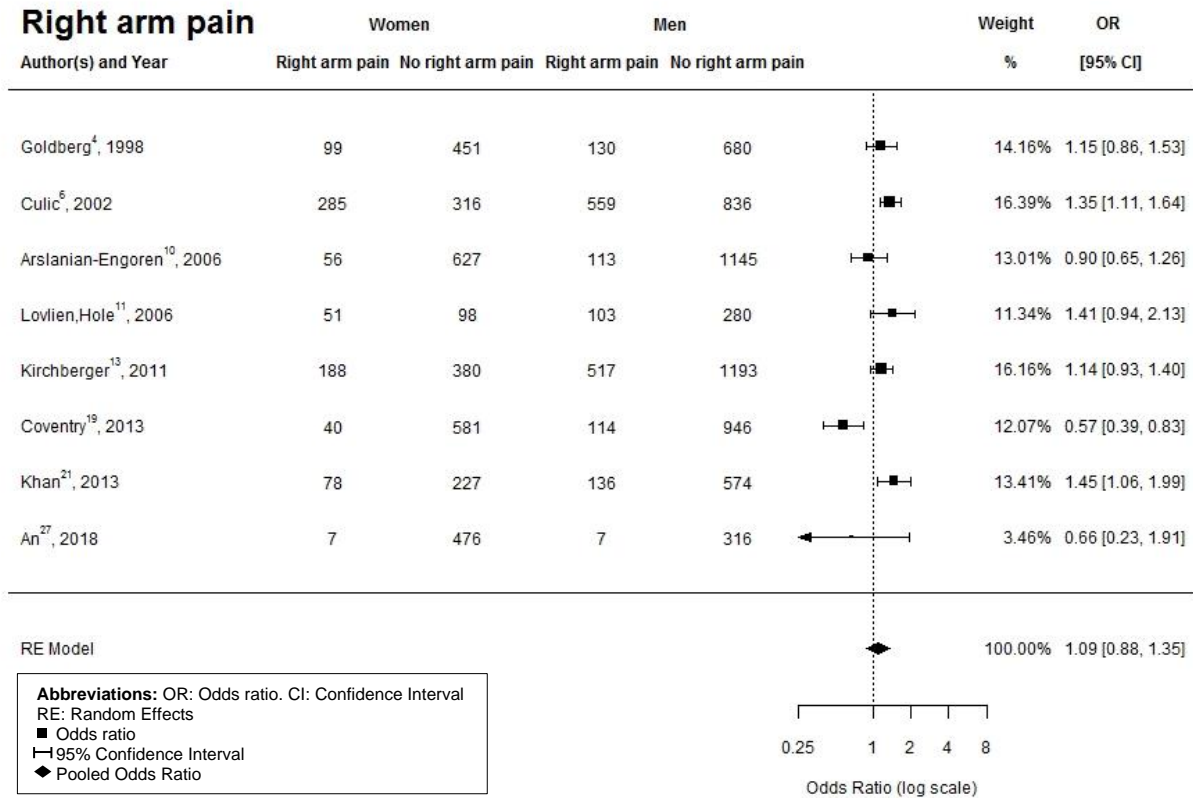

**Figure S24. Results of the aggregated meta-analysis for shortness of breath as a symptom of ACS in women relative to men summarised in a forest plot.**

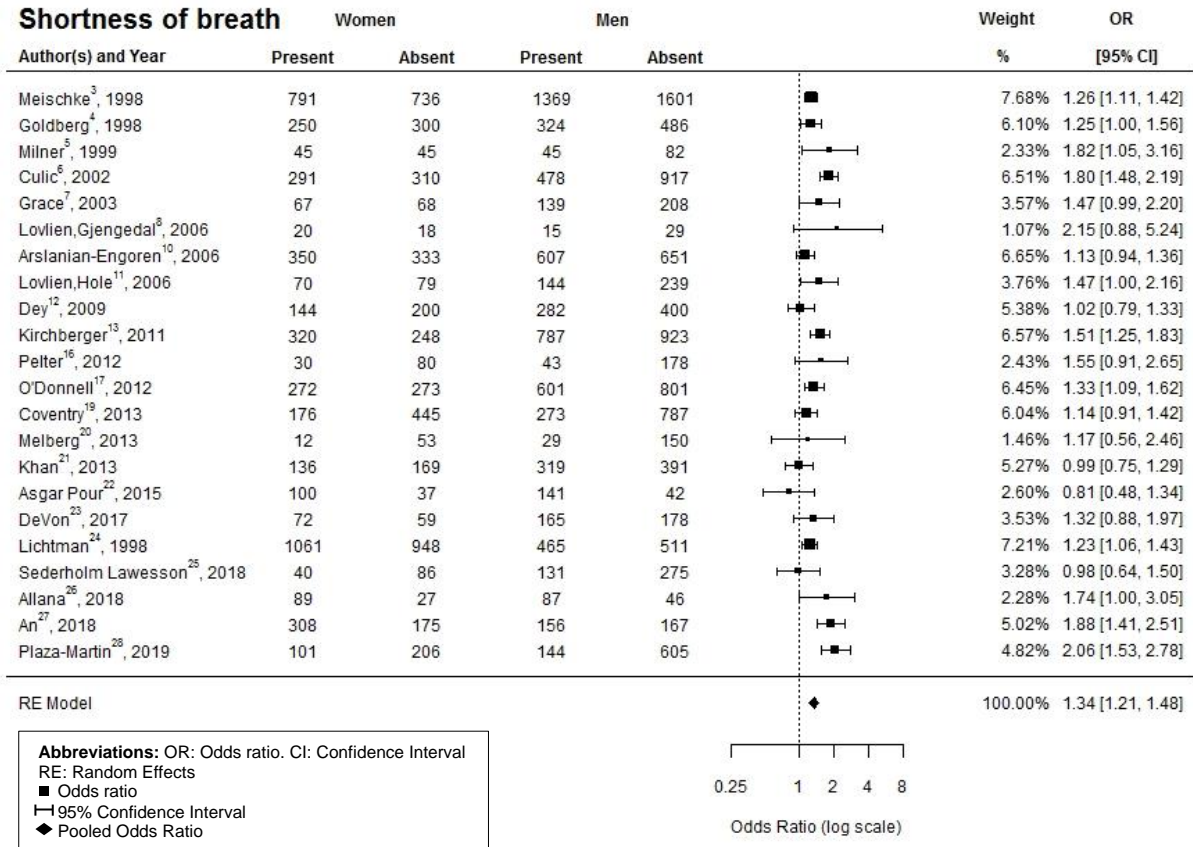



**Figure S25. Results of the aggregated meta-analysis for stomach or epigastric pain as a symptom of ACS in women relative to men summarised in a forest plot.**

### Stomach or epigastric pain

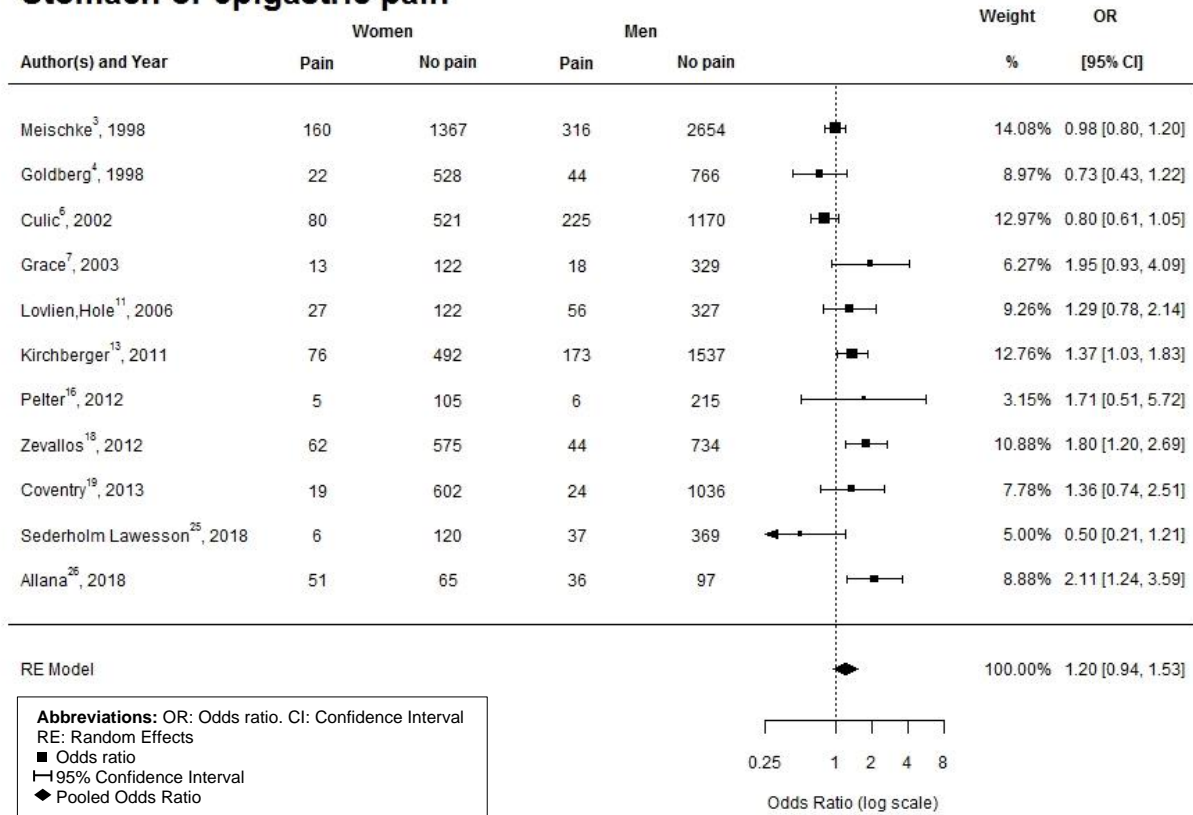

**Figure S26. Results of the aggregated meta-analysis for syncope as a symptom of ACS in women relative to men summarised in a forest plot.**

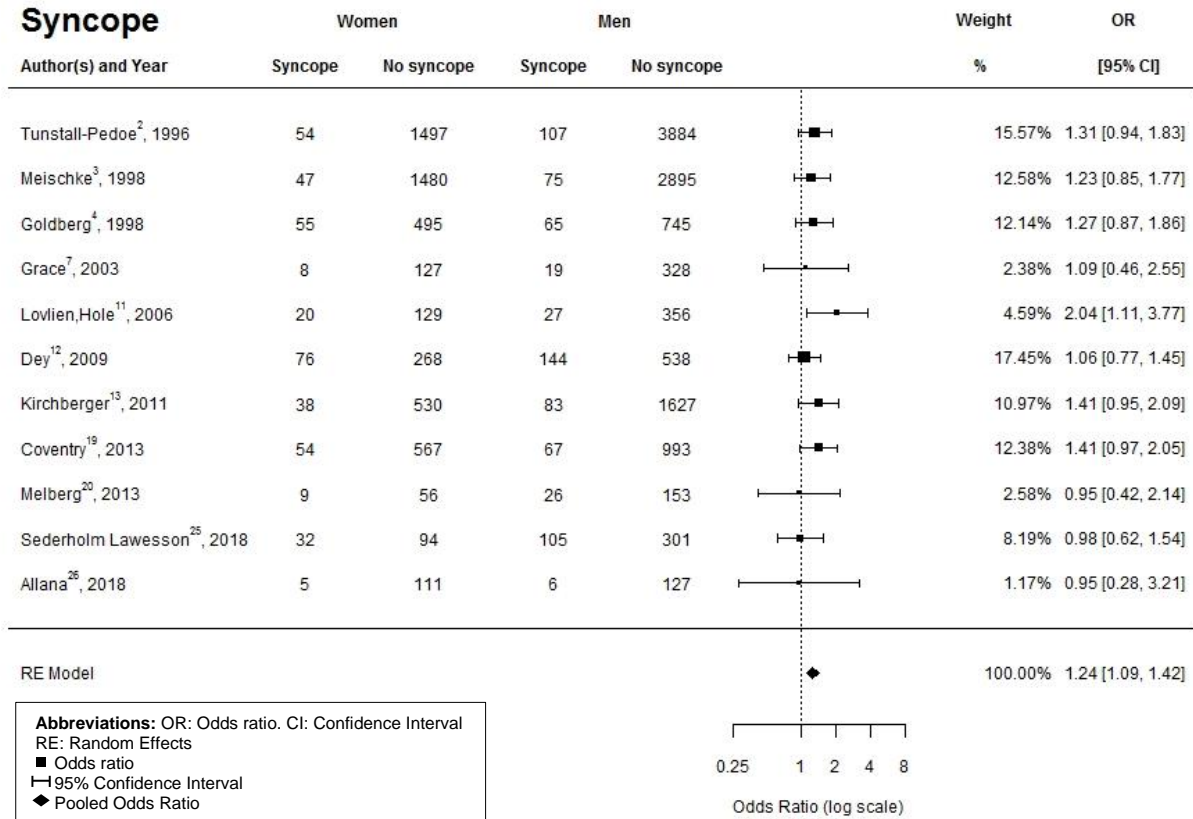

**Figure S27. Results of the cumulative meta-analysis for chest pain as a symptom of ACS in women relative to men summarised in a forest plot.**

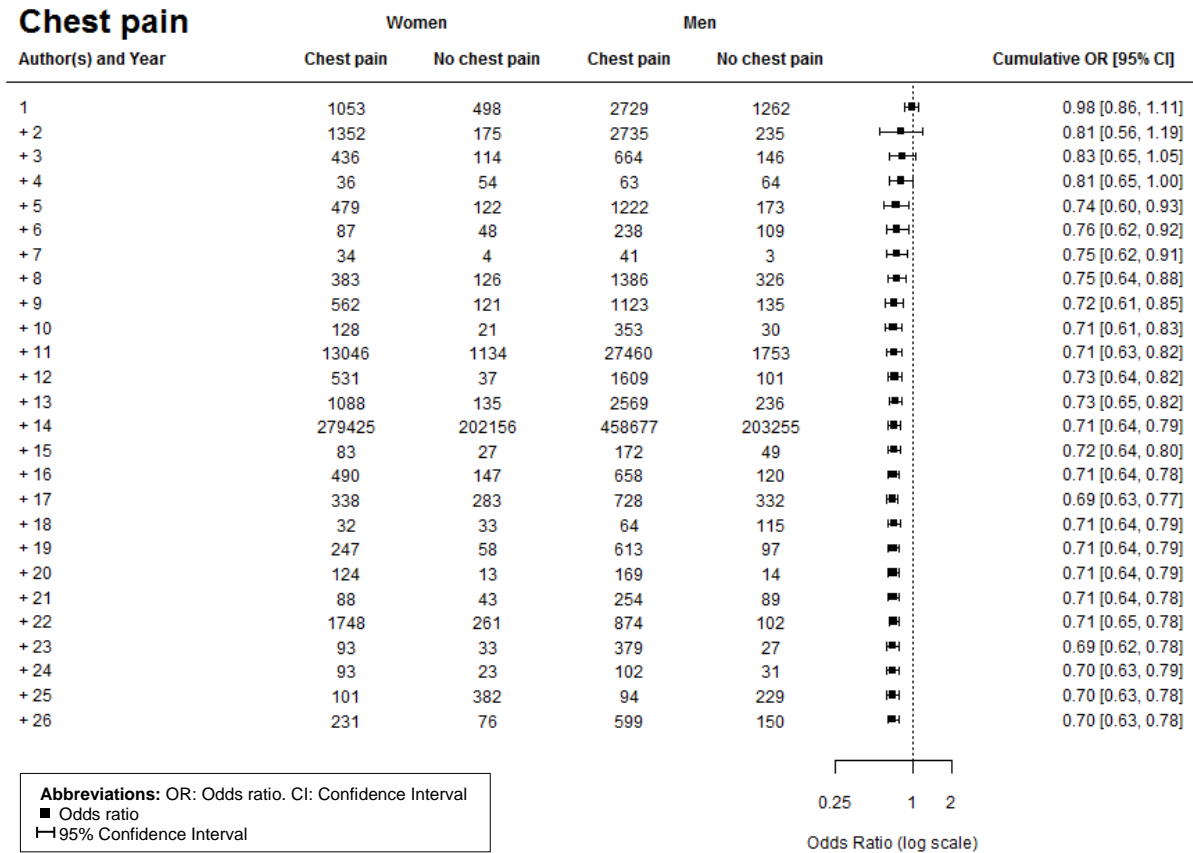

**Figure S28. Results of the cumulative meta-analysis for diaphoresis as a symptom of ACS in women relative to men summarised in a forest plot.**

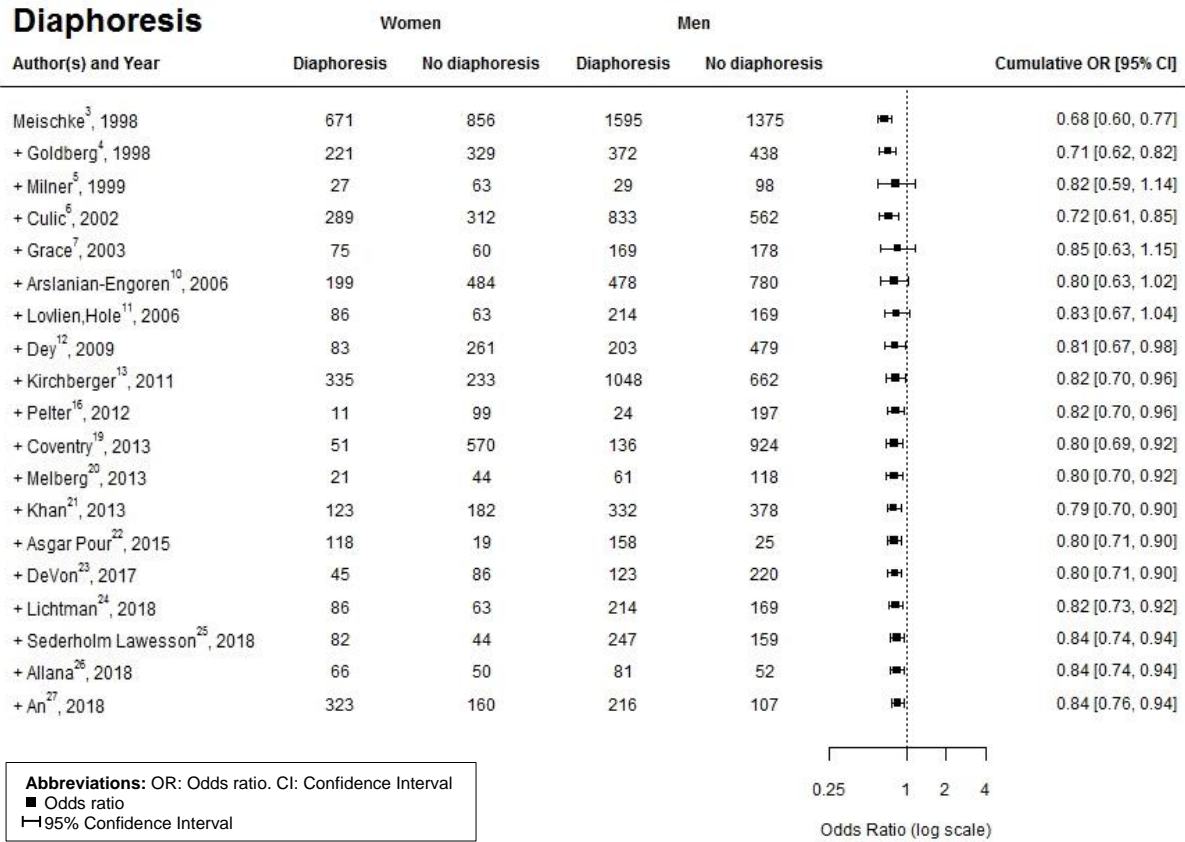

**Figure S29. Results of the cumulative meta-analysis for dizziness or light-headedness as a symptom of ACS in women relative to men summarised in a forest plot.**

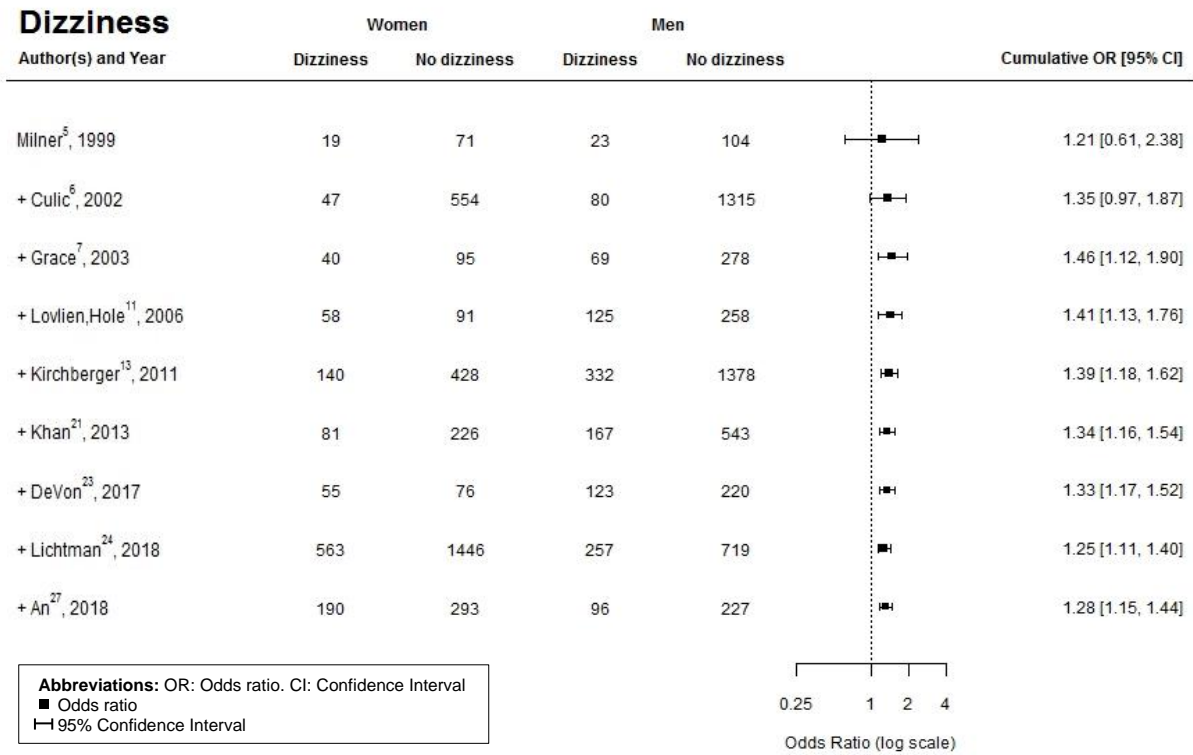

**Figure S30. Results of the cumulative meta-analysis for fatigue as a symptom of ACS in women relative to men summarised in a forest plot.**

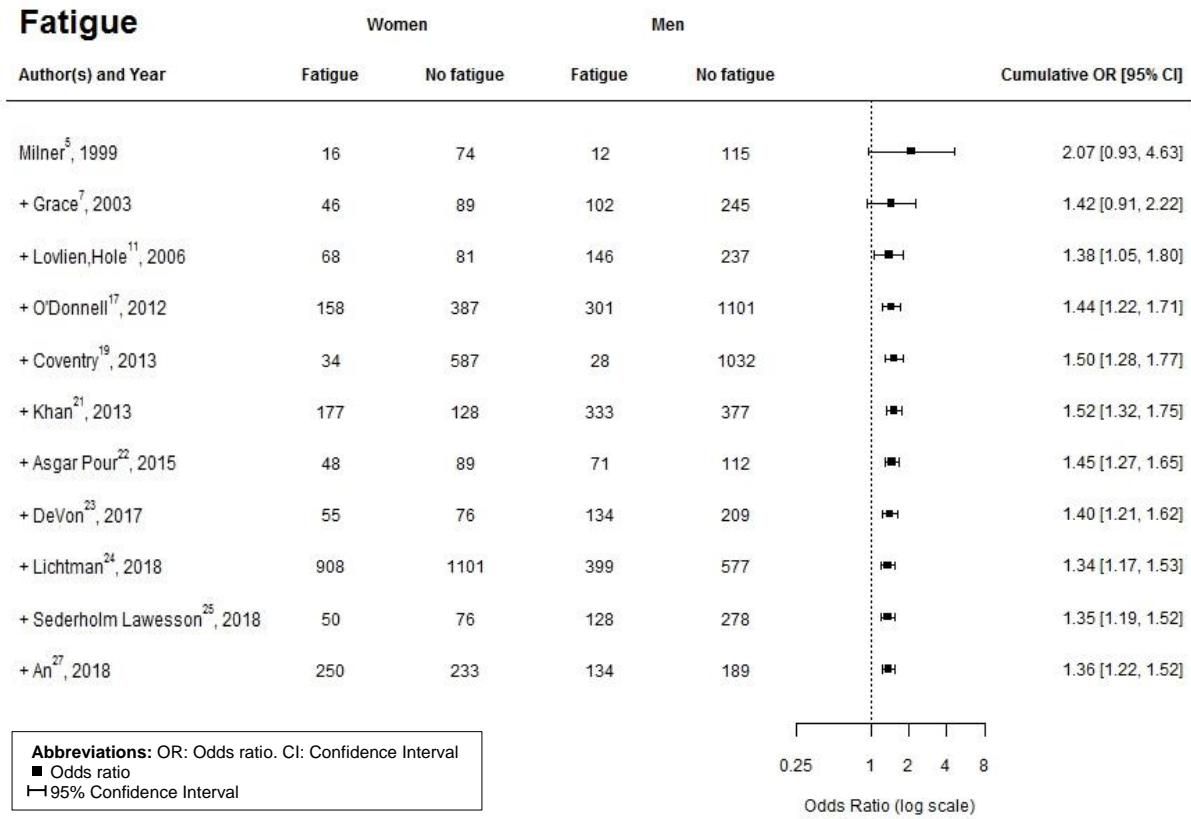

**Figure S31. Results of the cumulative meta-analysis for indigestion as a symptom of ACS in women relative to men summarised in a forest plot.**

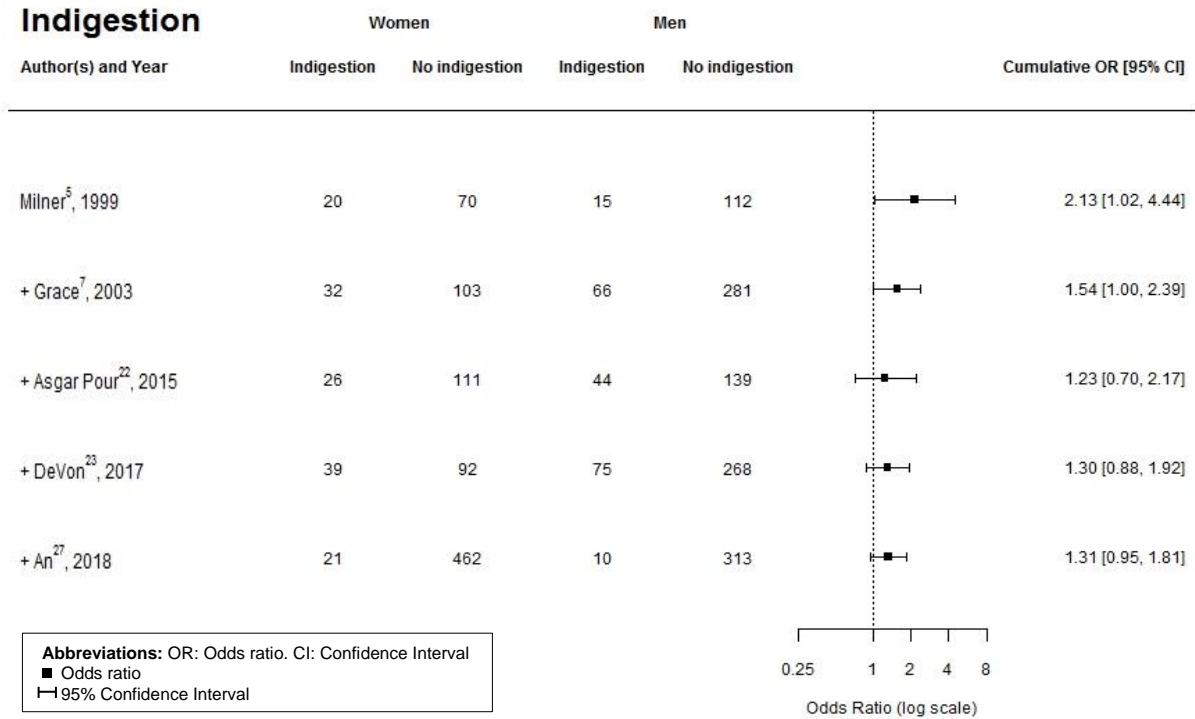

**Figure S32. Results of the cumulative meta-analysis for jaw pain as a symptom of ACS in women relative to men summarised in a forest plot.**

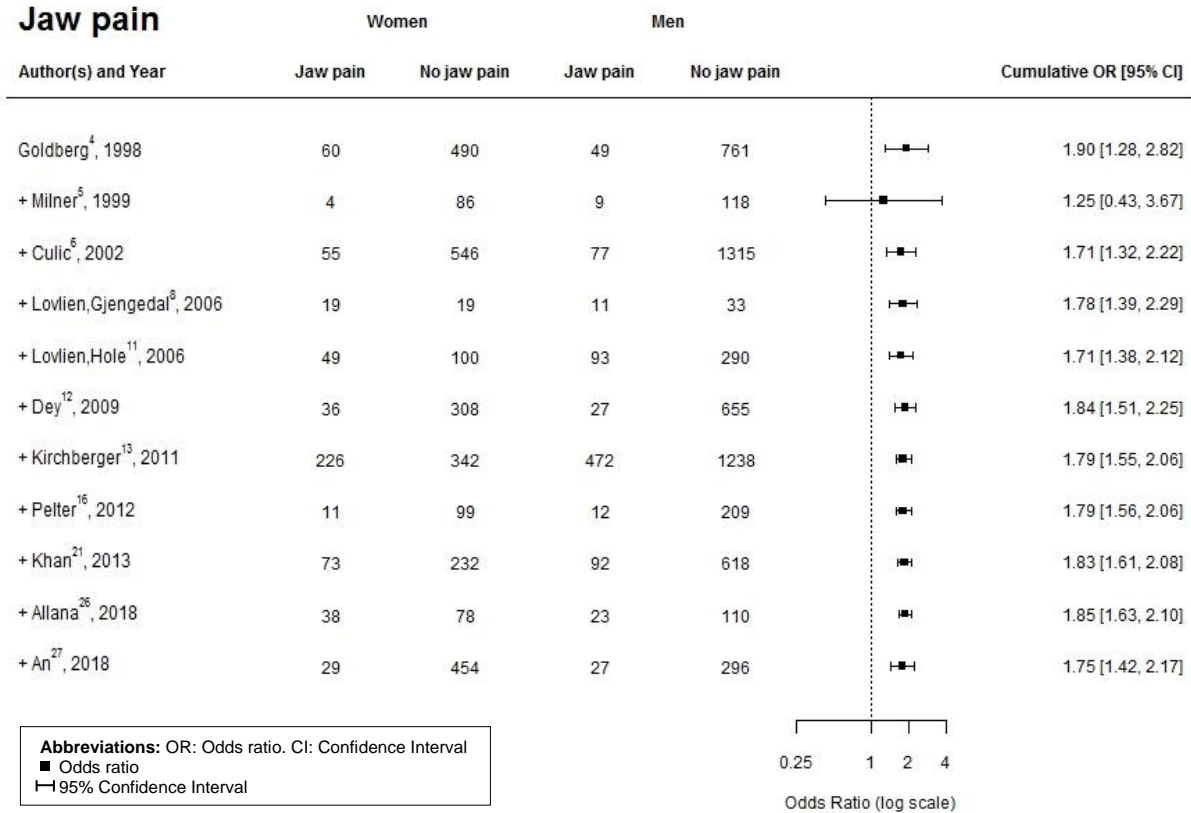



**Figure S33. Results of the cumulative meta-analysis for left arm pain or left shoulder pain as a symptom of ACS in women relative to men summarised in a forest plot.**

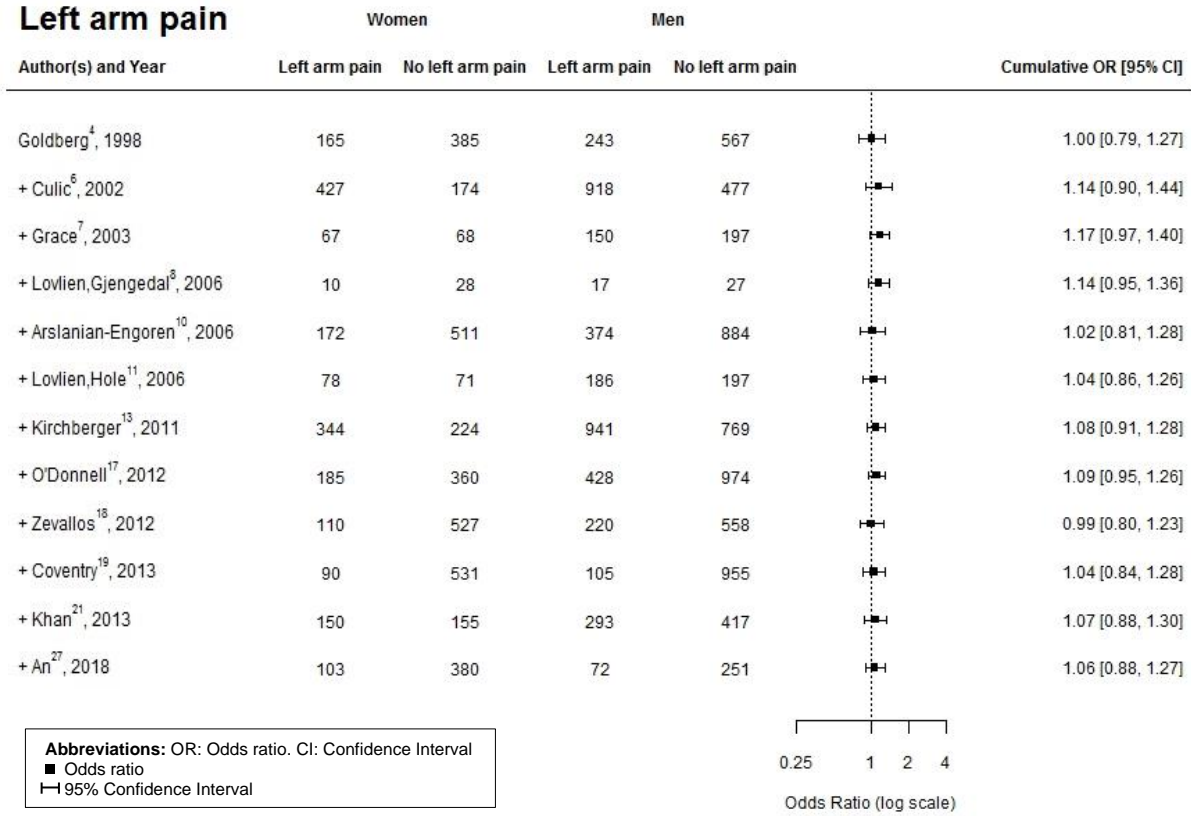

**Figure S34. Results of the cumulative meta-analysis for nausea or vomiting as a symptom of ACS in women relative to men summarised in a forest plot.**

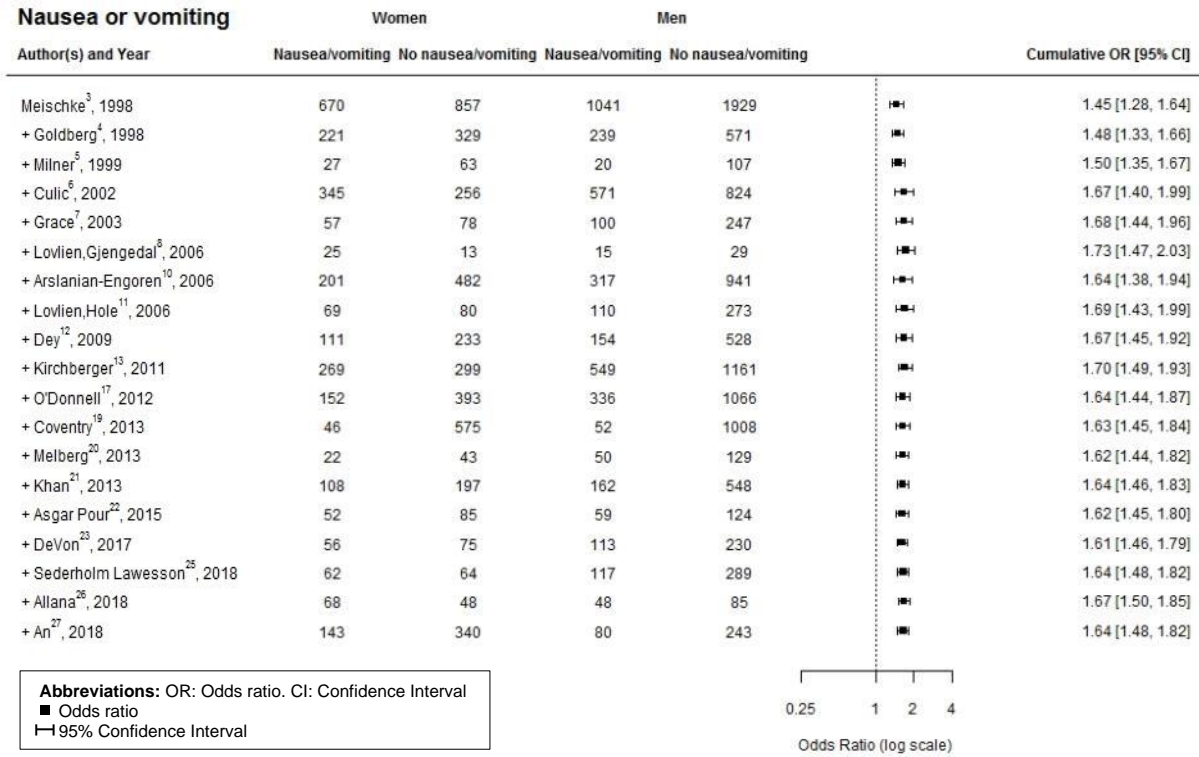

**Figure S35. Results of the cumulative meta-analysis for neck pain as a symptom of ACS in women relative to men summarised in a forest plot.**

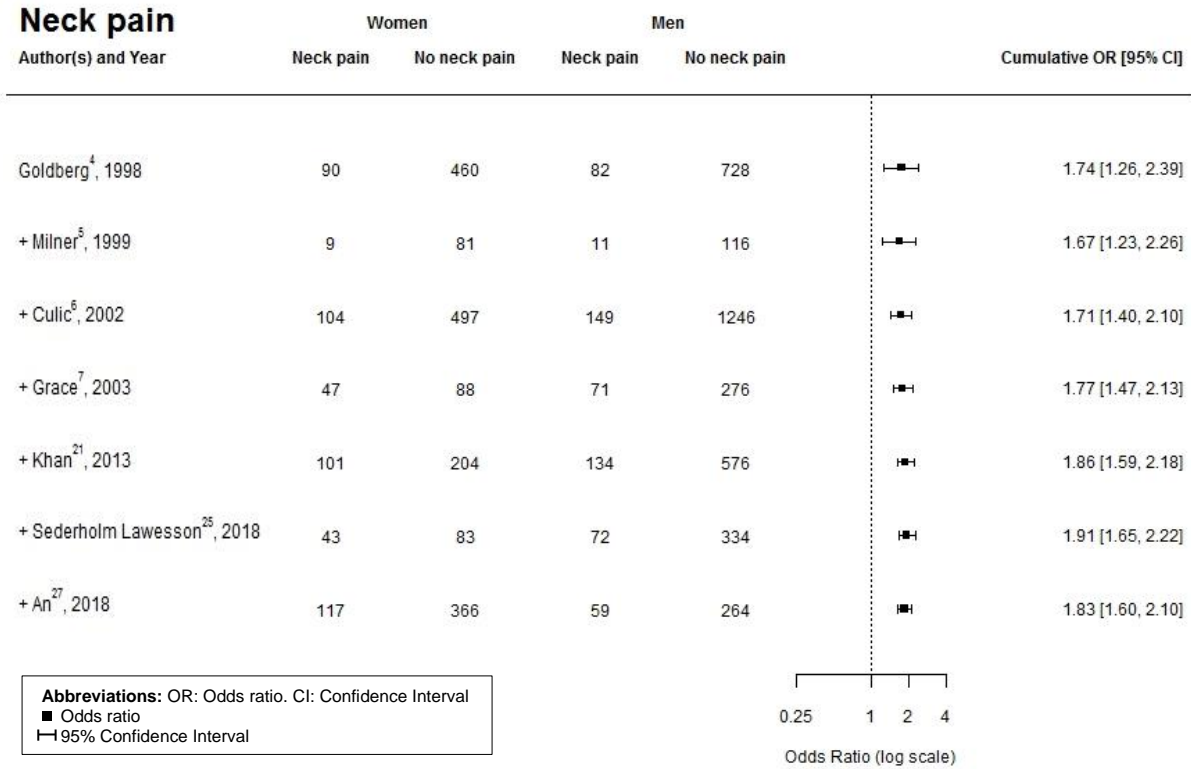

**Figure S36. Results of the cumulative meta-analysis for pain between shoulder blades as a symptom of ACS in women relative to men summarised in a forest plot.**

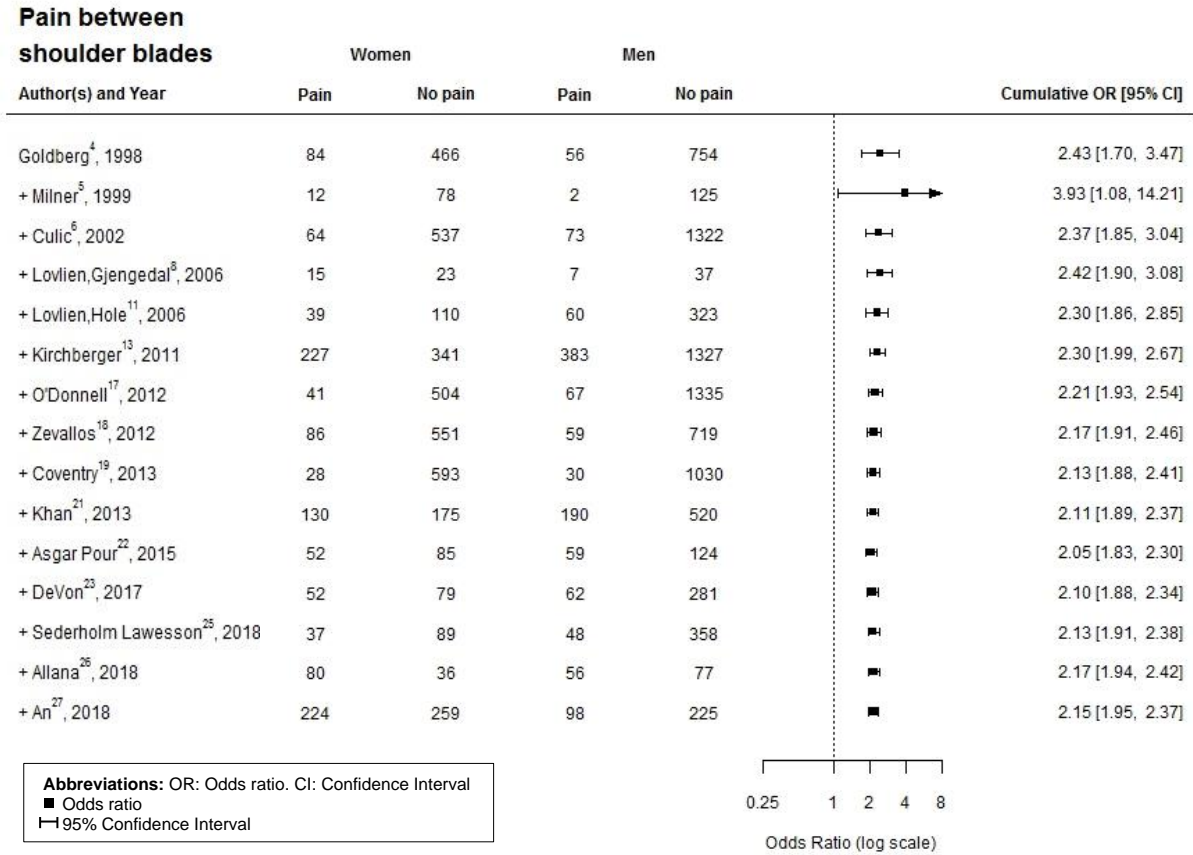

**Figure S37. Results of the cumulative meta-analysis for palpitations as a symptom of ACS in women relative to men summarised in a forest plot.**

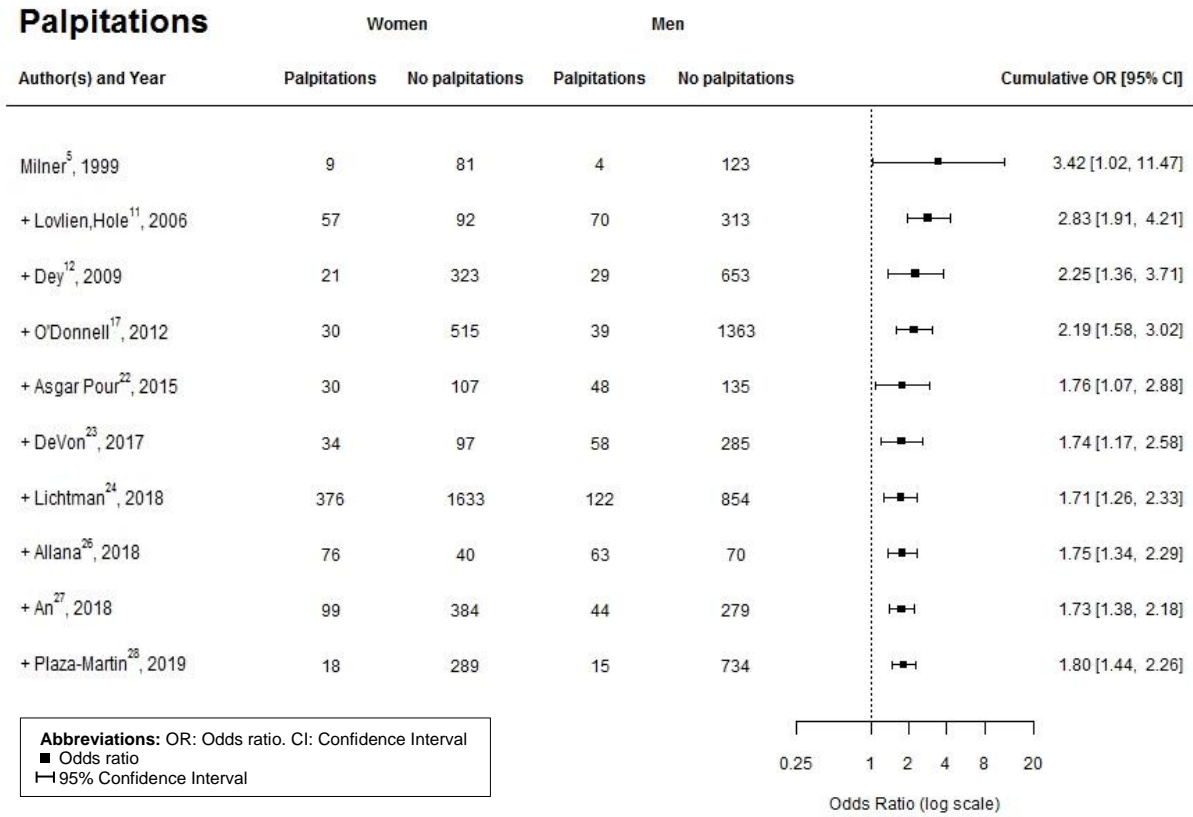

**Figure S38. Results of the cumulative meta-analysis for right arm pain or right shoulder pain as a symptom of ACS in women relative to men summarised in a forest plot.**

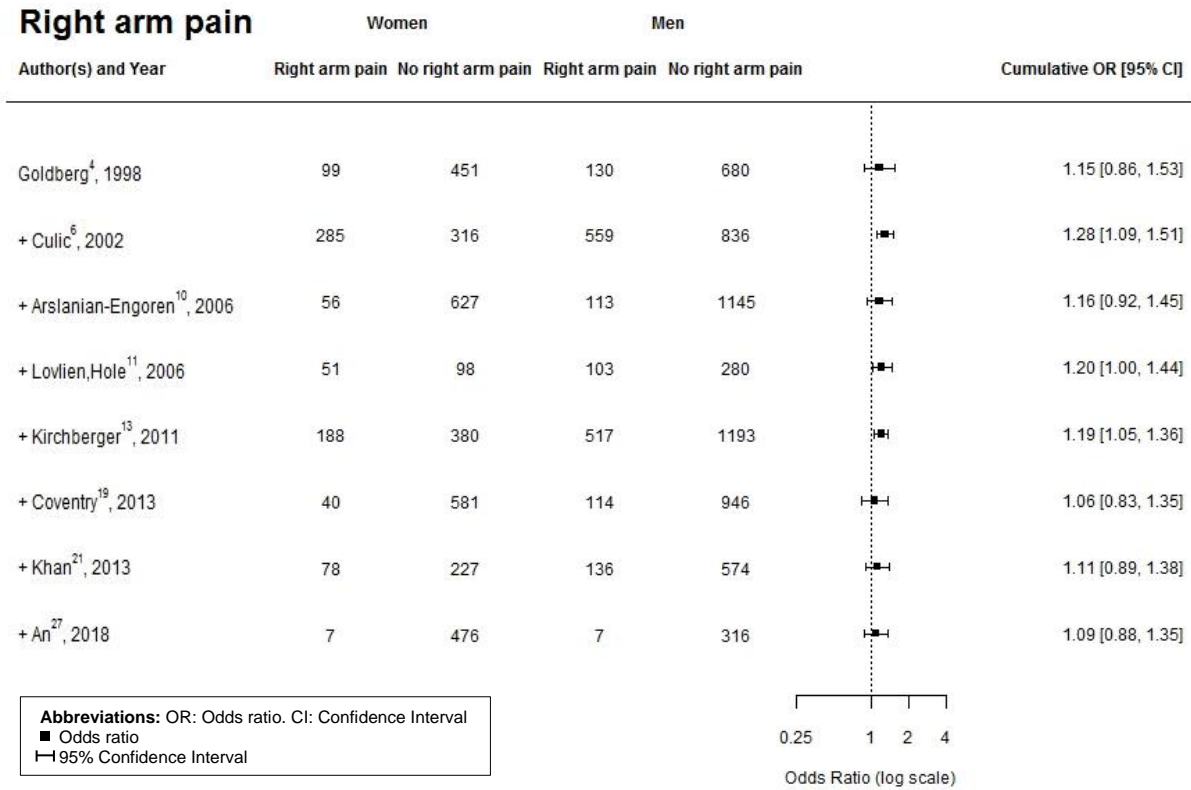

**Figure S39. Results of the cumulative meta-analysis for shortness of breath as a symptom of ACS in women relative to men summarised in a forest plot.**

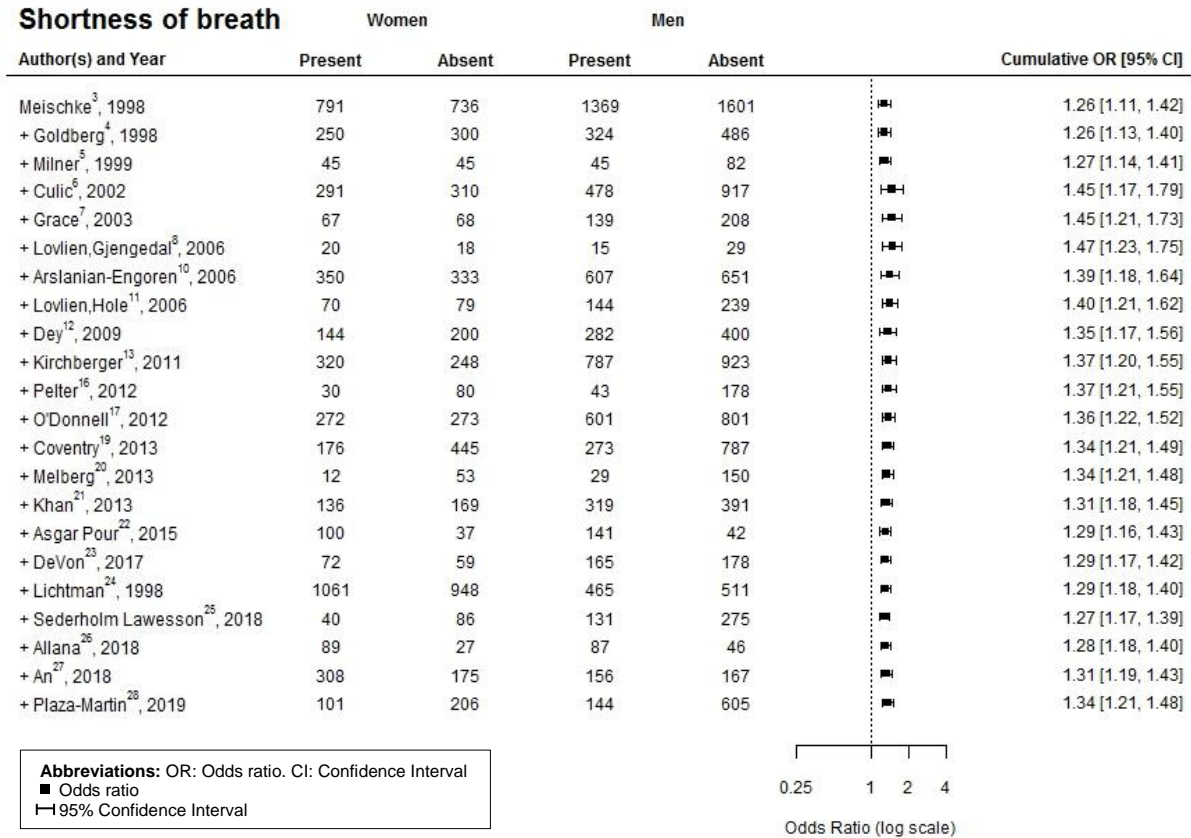

**Figure S40. Results of the cumulative meta-analysis for stomach and epigastric pain as a symptom of ACS in women relative to men summarised in a forest plot.**

### Stomach or epigastric pain

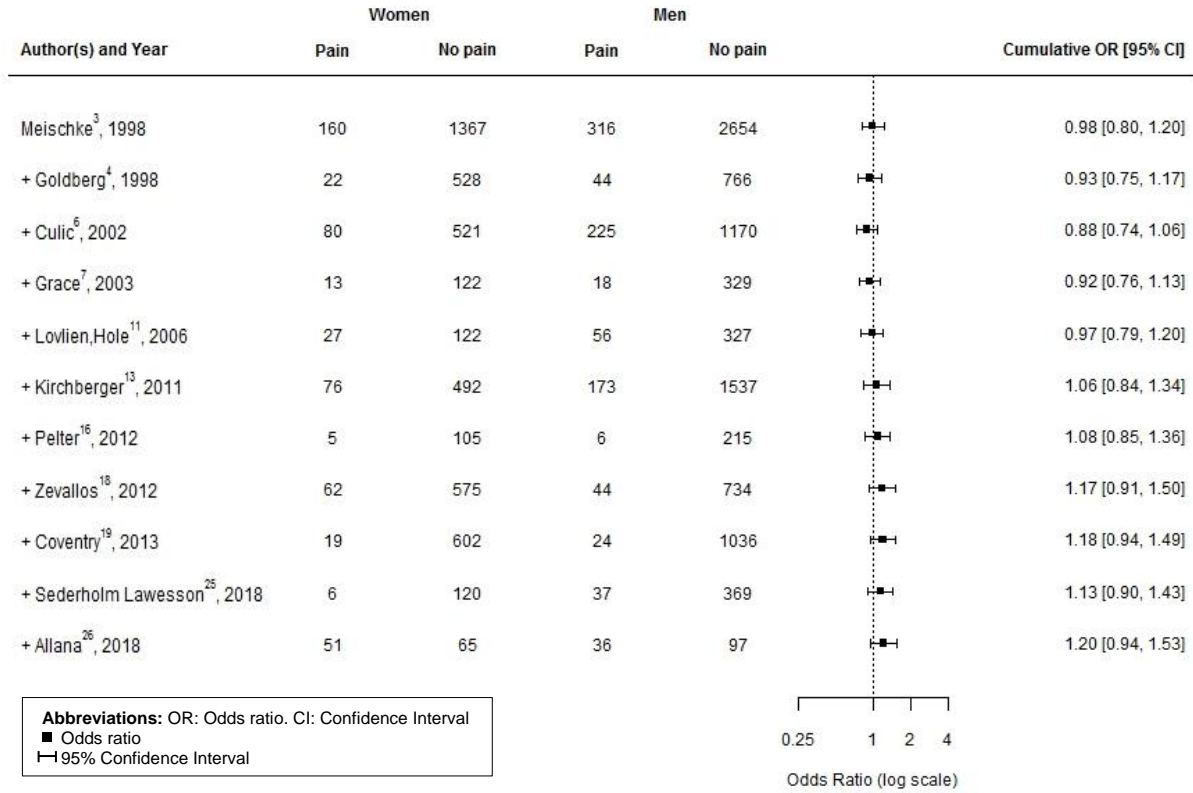



**Figure S41. Results of the cumulative meta-analysis for syncope as a symptom of ACS in women relative to men summarised in a forest plot.**

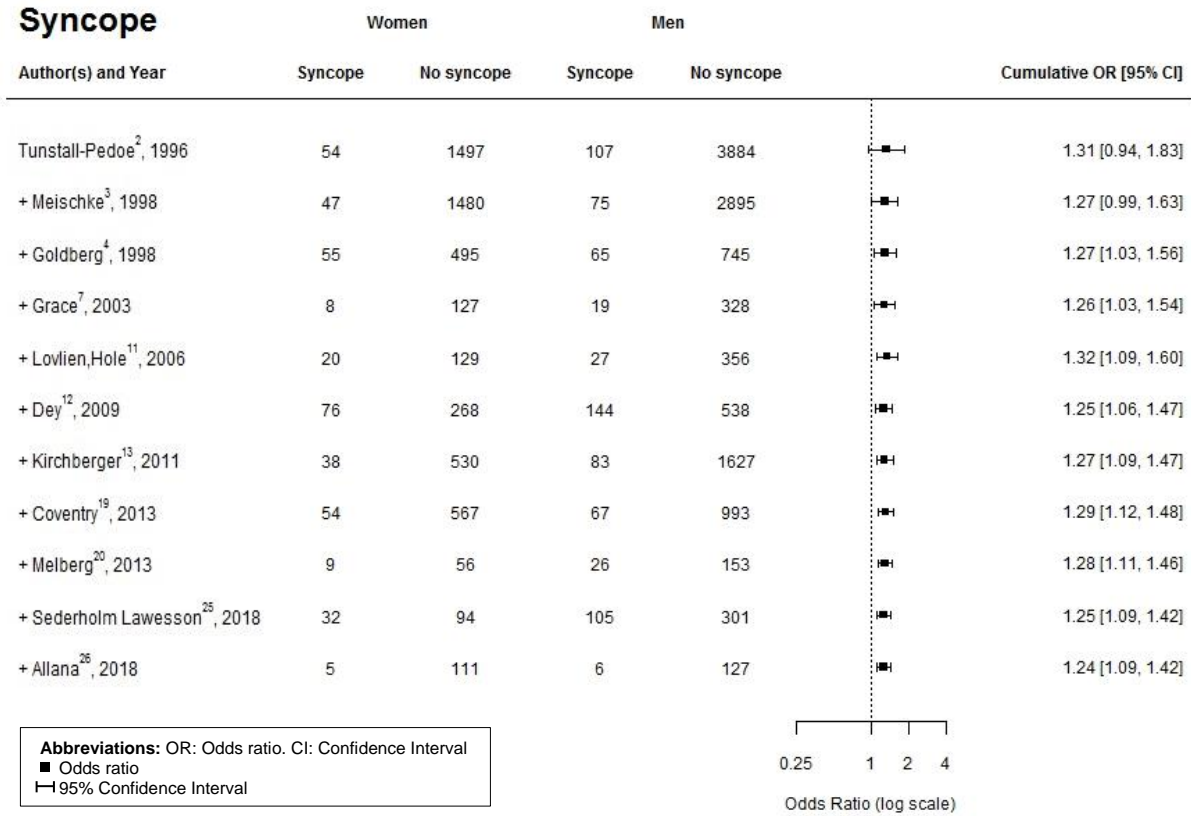

## Supplemental References:

1. Wells GA, Shea B, O'Donnell D, Peterson J, Welch V, Losos M, Tugwell P. The Newcastle-Ottawa Scale (NOS) for assessing the quality of nonrandomised studies in meta-analyses. Available at: [http://www.ohri.ca/programs/clinical\\_epidemiology/oxford.asp](http://www.ohri.ca/programs/clinical_epidemiology/oxford.asp). Accessed July 18, 2019.
2. Tunstall-Pedoe H, Morrison C, Woodward M, Fitzpatrick B, Watt G. Sex Differences in Myocardial Infarction and Coronary Deaths in the Scottish MONICA Population of Glasgow 1985 to 1991: Presentation, Diagnosis, Treatment, and 28-Day Case Fatality of 3991 Events in Men and 1551 Events in Women. *Circulation*. 1996; 93:1981–1992.
3. Meischke H, Larsen MP, Eisenberg MS. Gender differences in reported symptoms for acute myocardial infarction: Impact on prehospital delay time interval. *Am J Emerg Med*. 1998; 16:363–366.
4. Goldberg RJ, O'Donnell C, Yarzebski J, Bigelow C, Savageau J, Gore JM. Sex differences in symptom presentation associated with acute myocardial infarction: A population-based perspective. *Am Heart J*. 1998; 136:189–195.26.
5. Milner KA, Funk M, Richards S, Wilmes RM, Vaccarino V, Krumholz HM. Gender differences in symptom presentation associated with coronary heart disease. *Am J Cardiol*. 1999; 84:396–399.
6. Čulić V, Eterović D, Mirić D, Silić N. Symptom presentation of acute myocardial infarction: Influence of sex, age, and risk factors. *Am Heart J*. 2002; 144:1012–1017.
7. Grace SL, Abbey SE, Bisailon S, Shnek ZM, Irvine J, Stewart DE. Presentation, delay, and contraindication to thrombolytic treatment in females and males with myocardial infarction. *Women's Health Issues*. 2003; 13:214–221.
8. Løvlien M, Schei B, Gjengedal E. Are there gender differences related to symptoms of acute myocardial infarction? A Norwegian perspective. *Prog Cardiovasc Nurs*. 2006; 21:14–19.
9. Hirakawa Y, Masuda Y, Kuzuya M, Iguchi A, Uemura K. Japanese patients with acute myocardial infarction who present without chest pain: A high-risk group. *Int Heart J*. 2006; 47:483–490.
10. Arslanian-Engoren C, Patel A, Fang J, Armstrong D, Kline-Rogers E, Duvernoy CS, Eagle KA. Symptoms of men and women presenting with acute coronary syndromes. *Am J Cardiol*. 2006; 98:1177–1181.
11. Løvlien M, Schei B, Hole T. Women with myocardial infarction are less likely than men to experience chest symptoms. *Scand Cardiovasc J*. 2006; 40:342–347.
12. Dey S, Flather MD, Devlin G, Brieger D, Gurfinkel EP, Steg PG, Fitzgerald G, Jackson EA,

- Eagle KA; Global Registry of Acute Coronary Events investigators. Sex-related differences in the presentation, treatment and outcomes among patients with acute coronary syndromes: The Global Registry of Acute Coronary Events. *Heart*. 2009; 95:20–26.
13. Kirchberger I, Heier M, Kuch B, Wende R, Meisinger C. Sex differences in patient-reported symptoms associated with myocardial infarction (from the population-based MONICA/KORA myocardial infarction registry). *Am J Cardiol*. 2011; 107:1585–1589.
  14. Ängerud KH, Brulin C, Näslund U, Eliasson M. Patients with diabetes are not more likely to have atypical symptoms when seeking care of a first myocardial infarction. An analysis of 4028 patients in the Northern Sweden MONICA Study. *Diabet Med*. 2012; 29:e82-7.
  15. Canto JG, Rogers WJ, Goldberg RJ, Peterson ED, Wenger NK, Vaccarino V, Kiefe CI, Frederick PD, Sopko G, Zheng ZJ; NRMI Investigators. Association of age and sex with myocardial infarction symptom presentation and in-hospital mortality. *JAMA*. 2012; 307:813–822.
  16. Pelter MM, Riegel B, McKinley S, Moser DK, Doering L V., Meischke H, Davidson P, Baker H, Yang W, Dracup K. Are there symptom differences in patients with coronary artery disease presenting to the ED ultimately diagnosed with or without ACS? *Am J Emerg Med*. 2012; 30:1822–1828.
  17. O'Donnell S, McKee G, O'Brien F, Mooney M, Moser DK. Gendered symptom presentation in acute coronary syndrome: A cross sectional analysis. *Int J Nurs Stud*. 2012; 49:1325–1332.
  18. Zevallos JC, Yarzebski J, Banchs H, González-Sánchez JA, Mattei H, Goldberg RJ, González Mdel C, Quevedo J, Mojica G, Pericchi LR, García-Palmieri MR. Gender disparities in Puerto Ricans hospitalized with an initial acute myocardial infarction: A population-based perspective. *P R Health Sci J*. 2012; 31:192–198.
  19. Coventry LL, Bremner AP, Jacobs IG, Finn J. Myocardial infarction: Sex differences in symptoms reported to emergency dispatch. *Prehospital Emerg Care*. 2013; 17:193–202.
  20. Melberg T, Kindervaag B, Rosland J. Gender-specific ambulance priority and delays to primary percutaneous coronary intervention: A consequence of the patients' presentation or the management at the emergency medical communications center? *Am Heart J*. 2013; 166:839–845.
  21. Khan NA, Daskalopoulou SS, Karp I, Eisenberg MJ, Pelletier R, Tsadok MA, Dasgupta K, Norris CM, Pilote L, GENESIS PRAXY Team. Sex differences in acute coronary syndrome symptom presentation in young patients. *JAMA Intern Med*. 2013; 173:1863–1871.
  22. Asgar Pour H, Norouzzadeh R, Heidari MR. Gender differences in symptom predictors associated with acute coronary syndrome: A prospective observational study. *Int Emerg Nurs*. 2016; 25:13–18.

23. DeVon HA, Burke LA, Vuckovic KM, Haugland T, Eckhardt AL, Patmon F, Rosenfeld AG. Symptoms suggestive of acute coronary syndrome when is sex important? *J Cardiovasc Nurs.* 2017; 32:383–392.
24. Lichtman JH, Leifheit EC, Safdar B, Bao H, Krumholz HM, Lorenze NP, Daneshvar M, Spertus JA, D'Onofrio G. Sex Differences in the Presentation and Perception of Symptoms Among Young Patients With Myocardial Infarction: Evidence from the VIRGO Study (Variation in Recovery: Role of Gender on Outcomes of Young AMI Patients). *Circulation.* 2018; 137:781–790.
25. Sederholm Lawesson S, Isaksson RM, Thylén I, Ericsson M, Ångerud K, Swahn E. Gender differences in symptom presentation of ST-elevation myocardial infarction – An observational multicenter survey study. *Int J Cardiol.* 2018; 264:7–11.
26. Allana S, Moser DK, Ali TS, Khan AH. Sex differences in symptoms experienced, knowledge about symptoms, symptom attribution, and perceived urgency for treatment seeking among acute coronary syndrome patients in Karachi Pakistan. *Heart Lung.* 2018; 47:584–90.
27. An L, Li W, Shi H, Zhou X, Liu X, Wang H, Liu J, Fan S. Gender difference of symptoms of acute coronary syndrome among Chinese patients: a cross-sectional study. *Eur J Cardiovasc Nurs.* 2019; 18:179–84.
28. Plaza-Martín M, Sanmartín-Fernández M, Álvarez-Álvarez B, Andrea R, Seoane-García T, González-D'Gregorio J, Hernández-Betancor I, Rozado J, Carrasco-Ávalos F, Del Mar Alameda-Ortiz M, Gómez-Talavera S, Sanchís J, Anguita Sánchez M, Peral-Disdier V, Ibáñez B, Del Prado Díaz S, Zamorano Gómez JL. Contemporary differences between men and women with acute coronary syndromes: CIAM multicenter registry. *J Cardiovasc Med.* 2019; 20:525–530.
29. DeVon HA, Ryan CJ, Ochs AL, Moshe S. Symptoms across the continuum of acute coronary syndromes: Differences between women and men. *Am J Crit Care.* 2008; 17:14–24.
30. Omran S, Al-Hassan M. Gender differences in signs and symptoms presentation and treatment of Jordanian myocardial infarction patients. *Int J Nurs Pract.* 2006; 12:198–204.
31. Chen W, Woods SL, Wilkie DJ, Puntillo KA. Gender differences in symptom experiences of patients with acute coronary syndromes. *J Pain Symptom Manage.* 2005; 30:553–62.
32. DeVon HA, Zerwic JJ. The symptoms of unstable angina: do women and men differ? *Nurs Res.* 2003; 52:108–118.
